## Dynamics of Auxilin1 and GAK in clathrin-mediated traffic

Kangmin He<sup>1,2,3,#</sup>, Eli Song<sup>2,4,#</sup>, Srigokul Upadhyayula<sup>1,2,3,5,#</sup> Song Dang<sup>2</sup>, Raphael Gaudin<sup>1,2,6</sup>, Wesley Skillern<sup>2</sup>, Kevin Bu<sup>7,8</sup>, Benjamin R. Capraro<sup>1,9</sup>, Iris Rapoport<sup>1</sup>, Ilja Kusters<sup>1,2</sup>, Minghe Ma<sup>2</sup> and Tom Kirchhausen<sup>1,2,3,\*</sup>

<sup>1</sup>Department of Cell Biology, Harvard Medical School, 200 Longwood Ave, Boston, MA 02115, USA

<sup>2</sup>Program in Cellular and Molecular Medicine, Boston Children's Hospital, 200 Longwood Ave, Boston, MA 02115, USA

<sup>3</sup>Department of Pediatrics, Harvard Medical School, 200 Longwood Ave, Boston, MA 02115, USA

<sup>4</sup>Present Address: National Laboratory of Biomacromolecules, Institute of Biophysics, Chinese Academy of Sciences, Beijing 100101, China

<sup>5</sup>Present address: Department of Molecular and Cell Biology, University of California, Berkeley, Berkeley, CA 94720, USA

<sup>6</sup>Present Address: Institut de Recherche en Infectiologie de Montpellier - UMR 9004 - CNRS / UM, 1919 route de Mende - 34293 Montpellier cedex 5, France

<sup>7</sup>Department of Chemistry and Chemical Biology, Harvard University, Cambridge, MA 02138, USA

<sup>8</sup>Present Address: Department of Genetics and Genomic Sciences, Icahn School of Medicine at Mount Sinai, 1 Gustave L. Levy Pl, New York, NY 10029, USA.

<sup>9</sup>Present address: Cugene, Inc., Waltham, MA 02452, USA

#These authors contributed equally to this work.

\* Corresponding author:

Dr. Tom Kirchhausen

Harvard Medical School

200 Longwood Ave

Boston, MA 02115

[kirchhausen@crystal.harvard.edu](mailto:kirchhausen@crystal.harvard.edu)

phone: +1 617 713 8888

fax: +1 617 713 8898

34 **ABSTRACT**

35 **Clathrin coated vesicles formed at the plasma membrane lose their clathrin lattice within**  
36 **seconds of pinching off, through the action of the Hsc70 "uncoating ATPase". The J-domain**  
37 **containing proteins, auxilin1 (Aux1) and auxilin2/cyclin-G dependent kinase (GAK), recruit**  
38 **Hsc70. Aux1 and GAK are closely related homologs, each with a phosphatase- and tensin-like**  
39 **(PTEN-like) domain, a clathrin-binding region, and a C-terminal J-domain; GAK has an**  
40 **additional, N-terminal Ser/Thr kinase domain. The PTEN-like domain has no phosphatase**  
41 **activity, but it can recognize phosphatidylinositol phosphate head groups. Aux1 and GAK**  
42 **appear on coated vesicles in successive transient bursts, immediately after dynamin mediated**  
43 **membrane scission has released the vesicle from the plasma membrane. We show here that**  
44 **these bursts represent recruitment of a very small number of auxilins such that even 4-6**  
45 **molecules are sufficient to mediate uncoating. In contrast, we could not detect auxilins in**  
46 **abortive pits or at any time during coated-pit assembly. We have also shown previously that**  
47 **clathrin coated vesicles have a dynamic phosphoinositide landscape, and we have proposed**  
48 **that lipid head group recognition might determine the timing of Aux1 and GAK appearance. We**  
49 **now show that differential recruitment of Aux1 and GAK correlates with temporal variations in**  
50 **phosphoinositide composition, consistent with a lipid-switch timing mechanism.**

51

52 **INTRODUCTION**

53 Endocytic clathrin coats recruit molecular cargo as they assemble at the plasma membrane as coated  
54 pits and pinch off as coated vesicles. Cargo delivery then requires shedding of the clathrin lattice to  
55 liberate the enclosed vesicle (Kirchhausen et al., 2014). Disassembly of the coat, driven by the Hsc70  
56 "uncoating ATPase" (Braell et al., 1984; Schlossman et al., 1984; Ungewickell, 1985), occurs just a  
57 few seconds after vesicle release (Lee et al., 2006; Massol et al., 2006); the timing of Hsc70  
58 recruitment depends in turn on arrival of a J-domain containing protein, auxilin, immediately after the  
59 vesicle separates from the parent membrane (Lee et al., 2006; Massol et al., 2006). Human cells have  
60 two auxilin isoforms (Eisenberg and Greene, 2007). Auxilin2, expressed in all cells, has both a cyclin-  
61 G dependent kinase (GAK) domain and a phosphoinositide-phosphatase-like domain N-terminal to its  
62 clathrin-binding and J-domains. The latter domain, although catalytically inactive, is a phosphatase  
63 and tensin-like (PTEN) module (Guan et al., 2010). Auxilin1, expressed principally in neurons, has  
64 PTEN-like, clathrin-binding, and J-domains, but lacks the N-terminal kinase. We refer to these two  
65 auxilins as GAK and Aux1, respectively.

66

67 Aux1 and GAK contact three different clathrin heavy chains, from three different triskelions, when it  
68 associates with a clathrin coat (Fotin et al., 2004a). Because of the highly intertwined organization of  
69 a clathrin lattice (Fotin et al., 2004b), each of the contacts is with a distinct heavy-chain segment. The

70 heavy chain also has an Hsc70 attachment site near its inward projecting C-terminus (Scheele et al.,  
71 2003), to which a nearby auxilin J domain can recruit Hsc70:ATP. A cryo-EM structure of Aux1- and  
72 Hsc70 bound coats at ~11 Å resolution (Fotin et al., 2004a) suggested that no more than one Hsc70  
73 could associate with an assembled trimer, since the three docking sites appeared too close to each  
74 other to allow multiple occupancy, but overlap of the three possible orientations precluded fitting the  
75 known Hsc70 structure to density. From *in vitro*, single-molecule analysis of Hsc70 driven uncoating  
76 we found that for coats saturated with auxilin, Hsc70 triggered rapid, apparently cooperative  
77 disassembly when it had accumulated to a critical level of about one molecule per two clathrin trimers  
78 (Bocking et al., 2011). Ensemble kinetic experiments from another laboratory (Rothnie et al., 2011)  
79 suggested a quite different picture, however, in which sequential binding (and concomitant ATP  
80 hydrolysis) by three Hsc70 molecules would be required to release each trimer.

81

82 In the work described here, we have sought to resolve these conflicting conclusions by studying the  
83 molecular mechanism of uncoating in the natural environment of a living cell. We have expressed,  
84 from its endogenous locus, Aux1 or GAK bearing a genetically encoded fluorescent tag and followed  
85 recruitment to endocytic coated vesicles by TIRF imaging with single-molecule sensitivity. We find  
86 that the burst-like recruitment of Aux1 or GAK that leads to uncoating, following scission of the  
87 membrane vesicle, is in all cases sub-stoichiometric and that uncoating with normal kinetics can occur  
88 after just 4-6 molecules of one or the other protein has accumulated. We further show that auxilins  
89 are absent from assembling pits, thus ruling out the possibility that earlier arrival could lead to Hsc70-  
90 driven clathrin exchange during coated-pit formation or to uncoating of an incomplete lattice and  
91 hence to a futile assembly-disassembly cycle.

92

93 Continuous lipid modification provides a potential mechanism by which auxilin could detect that a  
94 vesicle has separated from the parent membrane (He et al., 2017). Proposals for the mechanism by  
95 which the uncoating machinery distinguishes a pinched-off vesicle from maturing coated pit have  
96 invoked phosphoinositide recognition by PTEN-like domain and an enzymatic mechanism that alters  
97 vesicle lipid composition following budding from the parent membrane (Cremona et al., 1999; He et al.,  
98 2017). We showed recently that the phosphoinositide composition of an endocytic coated vesicle  
99 remains unchanged until the moment of separation from the plasma membrane but then undergoes a  
100 well-defined series of sequential modifications, and we identified enzymes responsible for some of the  
101 transformations. We have now determined, with single-molecule sensitivity, the correlation of arrival  
102 times and quantities of Aux1 and GAK with steps in coat formation and disassembly. Recruitment of  
103 Aux1 and GAK then follows the temporal variations in phosphoinositide composition, dictated by the  
104 differential specificities of their PTEN-like domains. We further show that recruitment of only a small  
105 number of auxilin molecules is enough for complete uncoating. These observations define a

106 coincidence-detection and lipid-switch timing mechanism that distinguishes a coated vesicle from a  
107 coated pit and that launches the uncoating process as soon as coated-vesicle formation is complete.

108

## 109 **RESULTS**

### 110 ***Dynamics of auxilin mediated uncoating in gene-edited cells expressing fluorescently tagged*** 111 ***auxilins***

112 To study uncoating-associated recruitment of Aux1 and GAK, we established cell lines expressing  
113 fluorescently tagged Aux1 or GAK by homozygous replacement with a corresponding chimera bearing  
114 EGFP at its N-terminus (EGFP-Aux1 or EGFP-GAK) (Fig. 1a and Supplementary Fig. 1a-c). The  
115 same cells also had either full replacement of clathrin light chain A (CLTA) with the fluorescent  
116 chimera CLTA-TagRFP or full replacement of AP2- $\sigma$ 2 with AP2- $\sigma$ 2-TagRFP. We chose SUM159 cells  
117 (Forozan et al., 1999), a largely diploid, human breast cancer-derived cell line because, like HeLa  
118 and other non-neuronal lines (Borner et al., 2012; Hirst et al., 2008), these cells express both Aux1  
119 and GAK (Supplementary Fig. 1b,c). We confirmed that the clathrin-mediated endocytic efficiency of  
120 the gene-edited cells was similar to that of the parental cells, by using flow cytometry to measure  
121 receptor-mediated uptake of fluorescently tagged transferrin (Supplementary Fig. 1d,e).

122

123 We confirmed the burst-like recruitment of EGFP-Aux1 and EGFP-GAK, restricted to the time of  
124 clathrin uncoating (Fig. 1b-h), by analyzing fluorescent traces from time series acquired by TIRF  
125 microscopy of gene-edited cells (see Methods). The Aux1 bursts and most GAK bursts occurred at  
126 the relatively immobile clathrin spots we have shown to be associated with endocytic events (Ehrlich  
127 et al., 2004). GAK, but not Aux1, also associates with the more mobile, clathrin-coated structures  
128 emanating from the trans-Golgi network (TGN) and endosomes (Greener et al., 2000; Kametaka et al.,  
129 2007; Lee et al., 2005; Zhang et al., 2005), and a few objects in the EGFP-GAK expressing cells  
130 indeed appeared mobile in our TIRF microscopy time series. We confirmed this differential  
131 recruitment by full volume 3D live-cell lattice light-sheet microscopy (Fig. 2a,b,d).

132

133 In cells expressing AP2- $\sigma$ 2-TagRFP, nearly all (~90%) AP2-containing structures with lifetimes shorter  
134 than 20 s incorporated relatively small amounts of AP2, failed to recruit EGFP-Aux1 or EGFP-GAK  
135 and had a distinct quasi-exponential decay distribution of lifetimes associated with a stochastic coat  
136 dissociation process (Fig. 1m,n). These correspond to early abortive coated pits described in earlier  
137 work (Aguet et al., 2013; Ehrlich et al., 2004; Loerke et al., 2009). These characteristics match the  
138 properties of abortive coated pits described by Aguet et al using the dynamin burst as a surrogate  
139 marker (Aguet et al., 2013).

140

141 As we and others have shown (Aguet et al., 2013; Ehrlich et al., 2004; Hong et al., 2015; Loerke et al.,  
142 2009), the interval between initiation of an AP2-containing endocytic coated pit and its pinching off  
143 from the plasma membrane as a coated vesicle ranges between 20 and 150 s. Most of these  
144 structures (~90%) incorporated greater amounts of AP2 than did the short-lived ones, displayed a  
145 multimode lifetime distribution characteristic of a process governed by the superposition of multiple  
146 steps and showed at the time of uncoating a burst of EGFP-Aux1 or EGFP-GAK (Fig. 1m,n). The  
147 multimode lifetime distribution is a signature of productive coated pits, precisely as defined by (Aguet  
148 et al., 2013; Ehrlich et al., 2004; Loerke et al., 2009). Those few longer-lived structures (~10%) that  
149 failed to recruit auxilins had a characteristic quasi-exponential decay in their lifetime distributions (Fig.  
150 1m,n) and probably corresponded to the late abortives observed previously (Aguet et al., 2013;  
151 Ehrlich et al., 2004; Loerke et al., 2009). These characteristics also match the properties of abortive  
152 coated pits using dynamin as a surrogate marker (Aguet et al., 2013; Ehrlich et al., 2004; Loerke et al.,  
153 2009). We inferred from these observations that most endocytic clathrin coated vesicles recruited both  
154 auxilins, and we confirmed this inference (as described below) by observing concurrent recruitment of  
155 EGFP-Aux1 and TagRFP-GAK in double edited SUM159 cells (Fig. 2e).

156

### 157 ***Auxilins are not recruited to assembling clathrin-coated pits***

158 We were unable to detect EGFP-Aux1 or EGFP-GAK recruitment while coated pits were assembling,  
159 even with the single molecule sensitivity of our TIRF microscopy (Fig. 1c,d,f,g; Supplementary Fig. 2  
160 and Supplementary Video 1 and 2), and observed the burst recruitment only when assembly was  
161 complete. These results imply that an Aux1- and GAK-mediated process (and by inference Hsc70  
162 activity) cannot account for published *in vivo* observations of partial exchange of clathrin between  
163 assembling endocytic coated pits and a cytosolic clathrin pool (Eisenberg and Greene, 2007; Wu et  
164 al., 2001). We note that the lattice of the assembling coat is competent to bind Aux1, since Aux1-  
165 based sensors for phosphatidylinositol-4-5-phosphate (PtdIns(4,5)P<sub>2</sub>), the predominant lipid species in  
166 the plasma membrane, appear at coated pits in quantities that follow the clathrin content (He et al.,  
167 2017). The observed exchange is presumably a consequence of the dynamic equilibrium present at  
168 the edge of any growing two-dimensional array. This mechanism is also consistent with our  
169 observation that abortive-pit disassembly did not require the auxilin-dependent uncoating machinery.  
170 We conclude that until a coat is complete, clathrin can dissociate from an exposed edge unless  
171 stabilized by interaction with other components.

172

### 173 ***Recruitment specificity of auxilins***

174 To investigate the mechanism responsible for the recruitment specificity, we first analyzed the burst  
175 dynamics of Aux1 and GAK by 3D tracking of EGFP-Aux1 or EGFP-GAK from cells gene-edited to

176 express AP2- $\sigma$ 2-TagRFP together with EGFP-Aux1 or EGFP-GAK (Fig. 2c). The results, from time  
177 series obtained by 3D live-cell lattice light-sheet microscopy, showed that the time points for peak  
178 recruitment of Aux1 preceded those for GAK by  $\sim 1$  s ( $\sim 2.4$  s and  $\sim 3.2$  s peak recruitment after  
179 initiation of uncoating, respectively) (Fig. 2c). We found the same differential timing in gene-edited  
180 cells expressing both Aux1 and GAK, labeled with different fluorescent tags, EGFP and TagRFP,  
181 respectively (Fig. 2e-h; Supplementary Fig. 3a,c; Supplementary Video 3). We minimized the  
182 likelihood that the observed recruitment delays were due to the fluorescent tags by showing that Aux1  
183 and GAK maintained their differential timing in SUM159 cells gene-edited to express EGFP-GAK  
184 together with transient expression of mCherry-Aux1 or mCherry-GAK (Fig. 2i and Supplementary Fig.  
185 3b,d). Moreover, we found the same relative recruitment dynamics of Aux1 and GAK in monkey COS-  
186 7 cells and human HeLa cells transiently expressing EGFP-Aux1 and mCherry-GAK (Supplementary  
187 Fig. 3e,f). Inspection of the time series illustrated in Fig. 2 showed no strong correlation between the  
188 maximum recruitment amplitudes of Aux1 and GAK into the same coated vesicle (Fig. 2j).

189  
190 Why does Aux1 arrival precede recruitment of GAK? Our recent study (He et al., 2017) of  
191 phosphoinositide dynamics in endocytic compartments described sequential bursts of Aux1-based  
192 PtdIns(3)P and PtdIns(4)P sensors,  $\sim 1$ – $2$  s apart, accompanying endocytic clathrin coated vesicle  
193 uncoating (He et al., 2017). The results in Fig. 3 show a close correspondence between the arrival  
194 times at endocytic coated vesicles of a Aux1-based PtdIns(3)P sensor and Aux1 and between the  
195 ( $\sim 1$ – $2$  s later) arrival times of a Aux1-based PtdIns(4)P sensor and GAK. Likewise, replacement of  
196 Aux1 with the unrelated Epsin1 (binds clathrin) used to generate another set of PtdIns(3)P and  
197 PtdIns(4)P sensors (He et al., 2017) also led to sequential burst arrivals  $\sim 1$ – $2$  s apart (Supplementary  
198 Fig. 3h). These correlations suggest that phosphoinositide conversion determines the differential  
199 recruitment of Aux1 and GAK. This inference is also consistent with the results of *in vitro* lipid-protein  
200 overlay assays, which showed that PtdIns(3)P interacts preferentially with Aux1 (Massol et al., 2006)  
201 while PtdIns(4)P favors the PTEN-like domain of GAK (Lee et al., 2006). The observed lipid  
202 dependence of the Aux1- or GAK-mediated uncoating reaction was also observed in the *in vitro*  
203 single-object uncoating experiments described below using synthetic coated vesicles as substrate for  
204 the uncoating reaction.

205  
206 To determine the importance of the PTEN-like domain for the specificity of intracellular targeting of  
207 auxilin, we swapped the PTEN-like domains of Aux1 and GAK and followed the intracellular location  
208 of transiently expressed chimeric variants (Fig. 4). As confirmed above (Fig. 2b,d), wild-type GAK  
209 appears in the perinuclear TGN and recycling endosomes, both of which are enriched in PtdIns(4)P  
210 (Kural et al., 2012; Wang et al., 2003), as well as in endocytic coated vesicles (Fig. 4a). As shown

211 previously (Guan et al., 2010; Lee et al., 2006; Massol et al., 2006), the PTEN-like domain was  
212 essential for efficient targeting Aux1 or GAK to endocytic coated vesicles (Fig. 4c,h). A GAK chimera  
213 containing the PTEN-like domain of Aux1 replacing its own appeared exclusively in endocytic coated  
214 vesicles at the plasma membrane (Fig. 4e,f), and the extent to which this GAK-Aux1 chimera was  
215 recruited to those coated vesicles was similar to the extent of recruitment of wild-type Aux1 (Fig. 4g)  
216 but slightly less than that of wild-type GAK (Fig. 4a); the arrival time of this chimera also corresponded  
217 to the arrival time for wild-type Aux1 (Fig. 4m). The converse chimera, Aux1 with the PTEN-like  
218 domain of GAK, acquired the plasma membrane recruitment dynamics of wild-type GAK (Fig. 4j,k).  
219 Although the kinase domain was not required for recruiting GAK to endocytic coated vesicles, its  
220 presence substantially enhanced perinuclear targeting (Fig 4a,b). The kinase also enhanced  
221 perinuclear targeting of chimeric Aux1 with the GAK PTEN-like domain (Fig. 4j,k); adding it to wild-  
222 type Aux1 had no effect (Fig. 4l).

223

#### 224 ***Very few auxilins are sufficient to trigger uncoating***

225 Previous *in vitro* ensemble studies have suggested that less than one auxilin per vertex is sufficient to  
226 elicit Hsc70-driven disassembly of synthetic coats (Bocking et al., 2011). To determine the  
227 requirements for Aux1 and GAK *in vivo*, we took advantage of the high sensitivity of TIRF microscopy  
228 to follow recruitment of EGFP-Aux1 or EGFP-GAK to endocytic coated vesicles in gene-edited cells.  
229 We used oblique illumination to record 3-5 min time series of frames recorded once per second. We  
230 calibrated the fluorescence intensity as described in our previous work (He et al., 2017). The duration  
231 of the EGFP-Aux1 or EGFP-GAK bursts (6-8 sec) was the same as previously observed for the  
232 corresponding ectopically expressed proteins (He et al., 2017; Lee et al., 2006; Massol et al., 2006)  
233 (Fig. 1l). Most bursts contained between 2-8 and 2-12 molecules with peak values of 3 +/- 1 and 4 +/-  
234 2 molecules, for Aux1 and GAK respectively (Fig. 1e,h). Detailed analysis of 567 rapidly acquired  
235 EGFP-Aux1 or 276 EGFP-GAK traces revealed that the first recorded events were consecutive  
236 stepwise increases in fluorescence intensity (Supplementary Fig. 2e,f, selected examples). The  
237 number of Aux1 or GAK molecules recruited during each of the first two consecutive steps presented  
238 as histogram plots was determined by fitting the intensity distributions with the single-molecule  
239 calibration of fluorescence intensity (Supplementary Fig. 2e,f). The analysis suggests that recruitment  
240 begins with preferential arrival of a single auxilin during the initial step of recruitment followed by a  
241 second one (within the 62.5 ms time resolution of our measurements). The peak number of total  
242 auxilin molecules recruited during the burst ranged between 2-20 as determined by the peak  
243 fluorescence intensity of EGFP-Aux1 and EGFP-GAK simultaneously replaced in the same gene-  
244 edited cells (Fig. 1i). The duration of their combined bursts was slightly longer (~10 sec) than each  
245 one alone (Fig. 1k,l). We found no correlation between the number of recruited auxilins and the  
246 observed uncoating rate, nor did the peak level correlate with the size of the coat, as estimated from

247 the peak clathrin light-chain fluorescence intensity (Fig. 1j and Supplementary Fig. 1f,g). Most  
248 endocytic coated vesicle have between 36 and ~100 vertices; our results show that uncoating  
249 proceeds even when only a relatively small proportion of the vertices have acquired an auxilin. We  
250 found a similarly sub-stoichiometric GAK occupancy of AP1-containing carriers; the amplitude of the  
251 GAK burst at perinuclear clathrin spots ranged from ~5 to ~25 (Supplementary Fig. 3g).

252

253 The experiments just described showed that when the two auxilins were present together, a relatively  
254 small number of Aux1 and GAK molecules were sufficient for normal uncoating. We then proceeded  
255 to establish the contribution of Aux1 or GAK alone to clathrin-mediated uptake of transferrin and to the  
256 kinetics of clathrin uncoating, by imaging cells lacking GAK (by CRISPR/Cas9-mediated knockout) or  
257 depleted of Aux1 (by shRNA). Complete elimination of GAK (Supplementary Fig. 4a) had no  
258 significant effect on transferrin uptake (Supplementary Fig. 4b), while slightly increasing the lifetimes  
259 of clathrin coated structures at the plasma membrane and the number of EGFP-Aux1 molecules  
260 recruited during the burst (Fig. 5a). The expression level of Aux1 was unaffected (Supplementary Fig.  
261 4a). The interval associated with the EGFP-Aux1 burst (proportional to the amount of time required to  
262 uncoat) also increased slightly (Supplementary Fig. 4c). We obtained similar results with a transient,  
263 shRNA-based depletion of GAK (Supplementary Fig. 4d-g). Because we were unable to eliminate  
264 Aux1 by CRISPR/Cas9-mediated knockout, we used transient depletion with shRNA (Supplementary  
265 Fig. 4h). Aux1 depletion barely affected the rate of transferrin uptake (Supplementary Fig. 4i) or the  
266 efficiency of uncoating (Fig. 5b and Supplementary Fig. 4j) but led to a small increase in the peak  
267 number of GAK molecules recruited during the burst at the time of uncoating (Fig. 5b), mirroring the  
268 effect of GAK elimination.

269

270 Combined depletion of GAK and Aux1 in gene-edited cells led to substantial loss of endocytic coated  
271 vesicles (Supplementary Fig. 4k) and inhibition of transferrin uptake (Supplementary Fig. 4l), as  
272 expected from published knockdown experiments (Hirst et al., 2008). The remaining clathrin coated  
273 structures recruited small bursts of 1-2 molecules of EGFP-Aux1 (Fig. 5c) suggesting that very few  
274 auxilins can recruit enough Hsc70 for uncoating.

275

### 276 ***Uncoating dynamics mediated by auxilins lacking their PTEN-like domain***

277 The experimental results in Fig. 4 show that the PTEN-like domains of Aux1 and GAK determine  
278 timing and amplitude of recruitment to coated vesicles. A truncated Aux1 that retains just the clathrin-  
279 binding and J domains ( $\Delta$ PTEN Aux1) can nonetheless direct uncoating *in vitro* (Bocking et al., 2011),  
280 and ectopic expression of a GAK transgene encoding only the clathrin-binding and J-domains  
281 ( $\Delta$ PTEN GAK) reverses the lethality of a conditional GAK knockout in liver or brain of mice and



282 restores clathrin traffic in embryo fibroblasts derived from those mice (Park et al., 2015). We therefore  
283 compared the dynamics of recruitment and the compartment specificity of wild-type and  $\Delta$ PTEN  
284 auxilins in our SUM159 cells. Ectopic expression of various  $\Delta$ PTEN variants of Aux1 or GAK, in cells  
285 devoid of GAK and depleted of Aux1, rescued transferrin uptake (Supplementary Fig. 5a). In these  
286 cells, ectopically expressed  $\Delta$ PTEN EGFP-Aux1 or  $\Delta$ PTEN EGFP-GAK also exhibited a burst of  
287 recruitment, with amplitude of 1-5 EGFPs, just after completion of coat assembly (Supplementary Fig.  
288 5b,c). We chose for analysis cells with levels of ectopic expression comparable to those in gene-  
289 edited cells expressing the fluorescent auxilin under control of the endogenous promoter. Association  
290 with coated vesicles adequate to drive uncoating thus did not require PTEN-like domain recognition of  
291 phosphoinositides. The mean burst amplitude was comparable to the lowest amplitudes seen with full-  
292 length Aux1 or GAK, confirming that Hsc70 recruitment by relatively few auxilins can drive uncoating.

293  
294 The  $\Delta$ PTEN EGFP-Aux1 in the experiments just described lacked the PTEN lipid sensor, yet it  
295 appeared only in fully assembled coated vesicles and not in coated pits. In our previous paper (He et  
296 al., 2017), we showed that probes with the Aux1 clathrin-binding domain and a sensor for  
297 PtdIns(4,5)P<sub>2</sub> or PtdIns(4)P (phosphoinositides present in the plasma membrane) do appear in coated  
298 pits. Thus, during coated pit formation, recognition of the clathrin lattice appears to be necessary but  
299 not sufficient for auxilin recruitment; additional lipid-headgroup affinity is also required. After budding,  
300 however, clathrin coated vesicles can recruit Aux1 or GAK lacking any PTEN-like domain. The  
301 average recruitment levels for these species in our experiments was substantially lower than for the  
302 corresponding wild-type proteins, but it was nevertheless sufficient to elicit uncoating.

303  
304 We carried out similar experiments to show that GAK lacking its PTEN-like domain can rescue the  
305 AP1 coated-vesicle dispersal phenotype seen previously in HeLa cells depleted of full-length GAK  
306 (Kametaka et al., 2007; Lee et al., 2005) (Supplementary Fig. 5d,e). Low-level ectopic expression of  
307  $\Delta$ PTEN GAK in cells gene-edited to eliminate endogenous GAK led to recovery of the perinuclear  
308 distribution of AP1 seen in wild-type cells (Fig. 2d and Supplementary Fig. 5e). A PTEN-less GAK  
309 thus appears to allow normal coated vesicle function in the secretory pathway.

310

### 311 **Phosphoinositide binding preferences of Aux1 and GAK**

312 We sought further functional confirmation for the role of phosphoinositides in the uncoating reaction  
313 by using a previously established *in vitro* based uncoating assay designed to follow by single-object  
314 TIRF microscopy the ATP-, Hsc70 and auxilin dependent release of fluorescent clathrin from  
315 membrane-free clathrin/AP2 coats immobilized on a glass coverslip (Bocking et al., 2011). Binding of

316 the Aux1 or GAK PTEN-like domains with phosphoinositides is relatively weak, and we turned to this  
317 assay when the conventional lipid-strip binding or vesicle floatation assays proved unreliable.

318

319 We modified as follows our previous assay, in which disassembly of clathrin/AP2 coats, with no  
320 enclosed liposome and loaded with saturating amounts of PTEN-less Aux1 ( $\Delta$ PTEN-Aux1), was  
321 induced by addition of physiological amounts of ATP and Hsc70. First, we induced uncoating by  
322 simultaneous addition of recombinant  $\Delta$ PTEN-Aux1, full length Aux1 or GAK (~25 nM, an approximate  
323 physiological level) together with Hsc70 (1  $\mu$ M) in the presence of 2 mM ATP. Second, we used  
324 synthetic clathrin/AP2 coated vesicles generated by assembling clathrin/AP2 coats onto pre-formed  
325 liposomes, ~50-80 nm in diameter, doped with a peptidolipid bearing the YQRL endocytic motif  
326 (recognized by AP2) as well as with PtdIns(4,5)P<sub>2</sub> (recognized by AP2) and either PtdIns(3)P  
327 (preferentially recognized by Aux1) or PtdIns(4)P (preferentially recognized by GAK) (Fig. 6a,b and  
328 Supplementary Fig. 6); a representative example of a time series is shown in Supplementary Video 4.  
329 We included trace amounts of one of two fluorescent lipid dyes in each type of liposome to identify it  
330 uniquely and to distinguish between synthetic clathrin/AP2 coated vesicles and clathrin/AP2 coats; we  
331 labeled clathrin with a third fluorescent dye (Fig. 6c). The relative amounts of clathrin associated with  
332 each coat, before and during the uncoating reaction were determined, as illustrated by the  
333 representative traces in Fig. 6d, from which we obtained the dwell time for the uncoating reaction (i.e.,  
334 the interval between the first exposure to the uncoating mixture and initiation of clathrin release) (Fig.  
335 6d) and the efficiency of uncoating (how much fluorescent clathrin was released from a given  
336 synthetic clathrin/AP2 coated vesicle during the 150 s duration of the time series) (Supplementary Fig.  
337 6, Supplementary Video 4). Under these conditions, most clathrin/AP2 coats disassembled rapidly, in  
338 agreement with our earlier results from an *in vitro* single-object uncoating assay (Bocking et al., 2011;  
339 Bocking et al., 2018). In contrast, uncoating of the synthetic clathrin/AP2 coated vesicles was  
340 generally slower, and we could often detect partial release of the clathrin coat in what appeared to be  
341 steps (Fig. 6d). As expected for the control experiment carried out with the  $\Delta$ PTEN-Aux1 fragment  
342 unable to recognize lipids but retaining the clathrin-, AP2- and Hsc70-binding domains, dwell time and  
343 uncoating efficiency were equivalent for the clathrin/AP2 coats and for the PtdIns(3)P- and  
344 PtdIns(4)P-containing synthetic clathrin/AP2 coated vesicles (Fig. 6e, left panel; Supplementary Fig.  
345 6). Uncoating induced in the same assay by full length Aux1 initiated more rapidly for synthetic coated  
346 vesicles containing PtdIns(3)P (dwell time ~5 s) than it did for synthetic coated vesicles containing  
347 PtdIns(4)P (dwell time ~16 s) (Fig. 6e, middle panel), while uncoating induced by GAK initiated more  
348 rapidly for synthetic vesicles containing PtdIns(4)P (dwell time ~20 s) than it did for those containing  
349 PtdIns(3)P (dwell time ~29 s) (Fig. 6e, right panel). The observed dwell times, which we expect to  
350 depend on the kinetics of Aux1 or GAK recruitment, thus varied with lipid composition (the only

351 variable in the comparisons); the uncoating efficiency, which should depend only on the ultimate  
352 arrival of Hsc70, did not (Supplementary Fig. 6). We conclude that the PTEN-like domains of Aux1  
353 and GAK have phosphoinositide preferences for PtdIns(3)P and PtdIns(4)P, respectively.

354

## 355 **DISCUSSION**

356 The experiments described here have yielded several unexpected findings. One concerns the  
357 absence of detectable Aux1 or GAK during the assembly phase of the coated pits. Past experiments  
358 done by ectopic expression of Aux1 or GAK, often resulted in recruitment of Aux1 or GAK during the  
359 assembly phase; some have interpreted this recruitment as a way to explain the partial exchange of  
360 clathrin observed during coat assembly concluding by inference that this is an Hsc70 mediated  
361 process. Here, we have combined single-molecule live-cell imaging sensitivity with physiological  
362 expression of fluorescently tagged Aux1 and GAK to show absence of Aux1 and GAK during coated  
363 pit assembly (Supplementary Fig. 2c-f). These observations resolve a long-standing discussion by  
364 demonstrating that Aux1 and/or GAK cannot explain the exchange of clathrin during pit formation (and  
365 by inference that Hsc70 likewise has no role).

366

367 The second discovery concerned determination of the stoichiometry by which Aux1 and GAK are  
368 recruited to the clathrin/AP2 coat during uncoating. Understanding the extent of this recruitment is  
369 fundamental to understanding the mechanism of the uncoating process, and because Hsc70 is a  
370 "disassemblase" for many important cellular processes. We found that relatively few auxilins were  
371 sufficient for functional uncoating. Calibrated measurements showed that peak occupancy by 3-4  
372 molecules of Aux1 or GAK yielded complete uncoating and that only rarely was the Aux1 or GAK  
373 occupancy higher. Uncoating initiated with even fewer auxilins, and the maximum occupancy  
374 generally occurred after uncoating had begun, coinciding in average "cohort" traces with roughly 50%  
375 loss of clathrin (Fig. 1d,g). Moreover, when we eliminated GAK by gene editing and depleted Aux1 by  
376 RNAi, we found, in the cells with slightly incomplete knockdown, a maximal occupancy at any one  
377 time of just 1-2 Aux1 molecules per clathrin-coated vesicle, which nonetheless appeared to uncoat  
378 with normal kinetics.

379

380 High-affinity engagement of substrate by Hsc70 requires both a bound J-domain and ATP hydrolysis.  
381 Activated Hsc70 can therefore associate only at a vertex adjacent to its activating auxilin. The  
382 structure of Hsc70-bound coats suggests a vertex can accommodate no more than one Hsc70 (Xing  
383 et al., 2010). Auxilin occupancy is therefore a first-level estimate of the number of Hsc70s required for  
384 functional uncoating *in vivo*. If the time for Hsc70 recruitment, clathrin binding, ATP hydrolysis, and  
385 release from the J-domain is shorter than the uncoating time, however, the peak steady-state level of  
386 auxilin will sometimes underestimate the total number of auxilins that have participated. That is,

387 dissociation of auxilin from the neighborhood of one vertex, having delivered its Hsc70, and vicinal re-  
388 binding (or binding of a different auxilin) at another vertex could result in an apparent steady-state  
389 occupancy of only one auxilin but delivery of Hsc70s to two distinct vertices. Some individual traces of  
390 the few events we could find in GAK knockout cells with essentially complete Aux1 knockdown  
391 suggested that two or three single Aux1 molecules might have arrived independently during the  
392 course of uncoating. Putting together data from the various regimes we have examined, we estimate  
393 that recruitment of no more than 3-5 auxilins, and of probably fewer than 10 Hsc70s, is enough to  
394 dismantle coated vesicles in the size range (~60 clathrin trimers) present in the cells we have used.  
395 Under normal conditions of Aux1 or GAK expression, additional Hsc70s might participate. A recent  
396 model derived from ensemble *in vitro* uncoating experiments concluded that stoichiometric amounts of  
397 Aux1/GAK with respect to clathrin were recruited in order to mediate a proposed sequential capture of  
398 up to three Hsc70 molecules to each triskelion (Rothnie et al., 2011). We have now ruled out this  
399 model by the *in vivo* counting of the number of molecules of Aux1/GAK recruited to a coated vesicle  
400 during uncoating. Our data clearly show that the recruitment is sub-stoichiometric -- indeed, ~30% of  
401 all uncoating events occur with less than eight-recruited Aux1/GAK. Our *in vivo* data instead agree  
402 with earlier biochemical studies suggesting a 'catalytic' role for Aux1 and GAK during uncoating (Ma  
403 et al., 2002).

404

405 In previous *in vitro* single-molecule uncoating experiments, which were carried out by saturating the  
406 coats with auxilin and then adding Hsc70, we found from kinetic modeling that uncoating occurred  
407 precipitously when the Hsc70 level had reached an occupancy of about one for every two vertices  
408 (Bocking et al., 2011). Since auxilin itself stabilizes coats (Ahle and Ungewickell, 1990), this level is  
409 likely to be substantially greater than the Hsc70 occupancy needed to uncoat with limiting auxilin  
410 present. To address this question directly, we modified our single-molecule uncoating reaction in two  
411 ways: first, by inducing uncoating with a mixture of 1  $\mu$ M Hsc70 and 25 nM Aux1 or GAK (roughly  
412 physiological concentrations (Kulak et al., 2014), and second, by including as substrates synthetic  
413 clathrin/AP2 coated vesicles containing PtdIns(3)P or PtdIns(4)P. This assay is a sensitive functional  
414 test of how the kinetics of uncoating depends on lipid composition. We found that Aux1 initiated  
415 uncoating of vesicles containing PtdIns(3)P more rapidly than uncoating of vesicles containing  
416 PtdIns(4)P; GAK had the opposite preference. The onset of uncoating mediated by Aux1, GAK or  
417  $\Delta$ PTEN-Aux1 was the same when using as substrate clathrin/AP2 coats lacking any encapsulated  
418 liposome (Fig. 6). This functional assay was proved substantially more robust for the relatively low-  
419 affinity PTEN-like domains than did liposome or lipid-strip binding assays.

420

421 During uncoating, loss of clathrin and loss of AP2 follow each other closely. AP2 adheres to the  
422 plasma membrane by virtue of its affinity of PtdIns(4,5)P<sub>2</sub>, which is hydrolyzed (to PtdIns(4)P) by  
423 synaptojanin (in coated pits) and OCRL (in coated vesicles) (Chang-Ileto et al., 2011; He et al., 2017;  
424 Nandez et al., 2014). But only after pinching off of the vesicle does cessation of rapid exchange allow  
425 the PtdIns(4,5)P<sub>2</sub> concentration to fall and the PtdIns(4)P concentration to rise (He et al., 2017),  
426 reducing AP2 affinity for the vesicular membrane. Because AP2 also stabilizes clathrin association  
427 with the vesicle (and hence with other clathrins) (Kirchhausen et al., 2014), PtdIns(4,5)P<sub>2</sub> depletion  
428 after pinching may accelerate uncoating under conditions of limiting auxilin.

429  
430 Auxilin binding requires contributions from three different clathrin trimers organized in the lattice of a  
431 coat (Fotin et al., 2004a). Our results, together with our previously published work (He et al., 2017),  
432 show that coincident recognition of this local structure and of the cognate lipid determines the timing  
433 of normal Aux1 and GAK recruitment. Nonetheless, deletion of the PTEN-like domain did not fully  
434 disable auxilin association, which occurred as a low-amplitude burst following completion of coat  
435 assembly, with no evidence of premature association. Interactions other than with PtdIns(3)P (for  
436 Aux1) and PtdIns(4)P (for GAK) must therefore contribute to the observed dependence on vesicle  
437 closure. One possibility could be a slightly different structure (e.g., a "tighter" one, due to closure) of  
438 the clathrin lattice associated with coated vesicles resulting in enhanced accessibility of the Aux1/GAK  
439 binding regions in the clathrin terminal domain or in AP2 (Scheele et al., 2001). Our current data,  
440 however, offer no definitive evidence for the source of this redundancy.

441  
442 Finally, concerning the dynamics of coated pit / coated vesicle formation, we have shown a  
443 straightforward way to distinguish abortive coated pits (i.e., those that fail to form coated vesicles)  
444 from coated pits that mature and become coated vesicles. The best currently available method relies  
445 on a detailed analysis of the distribution of coated-pit lifetimes (Aguet et al., 2013). Because we have  
446 now shown that Aux1/GAK are recruited only to coated vesicles and not to assembling coated pits, we  
447 can simply segregate clathrin or AP2 traces by whether or not they end with an Aux1/GAK burst. This  
448 simple assignment, similar to the recruitment of dynamin (Aguet et al., 2013; Ehrlich et al., 2004),  
449 provides a robust way to distinguish between dissociation of the lattices of abortive pits and  
450 disassembly of the lattices of coated vesicles and hence between an abortive pit (whatever its  
451 lifetime) and one that proceeds to pinch off as a coated vesicle. We further note that the outcome of  
452 this analysis has shown in a simple way that the distinction between abortive and non-abortive events  
453 is a meaningful one.

454

455 **METHODS**

456 **Antibodies**

457 The antibody against Aux1/GAK was a kind gift from Sanja Sever (Massachusetts General Hospital,  
458 Harvard Medical School) (Newmyer et al., 2003). The antibody against GAK (M057-3) was purchased  
459 from MBL International Corp.

460

461 **Cell culture**

462 The mostly diploid SUM159 human breast carcinoma cells (Forozan et al., 1999) kindly provided by J.  
463 Brugge (Harvard Medical School) were routinely verified to be mycoplasma free using a PCR-based  
464 assay. SUM159 cells were grown at 37°C and 5% CO<sub>2</sub> in DMEM/F-12/GlutaMAX (GIBCO, Langley,  
465 OK), supplemented with 5% fetal bovine serum (FBS, Atlanta Biologicals, Lawrenceville, GA), 100  
466 U/ml penicillin and streptomycin (VWR International, Philadelphia, PA), 1 µg/ml hydrocortisone  
467 (Sigma-Aldrich, St. Louis, MO), 5 µg/ml insulin (Sigma-Aldrich, St. Louis, MO), and 10 mM HEPES  
468 (Mediatech, Manassas, VA), pH 7.4.

469

470 **Plasmids, transfection and ectopic expression**

471 The DNA sequences encoding the full-length bovine Aux1 (910 residues, NM\_174836.2), or full-  
472 length human GAK (1311 residues, NM\_005255.3) were amplified by PCR from full-length cDNA  
473 clones (Massol et al., 2006) and inserted into pEGFP-C1 or mCherry-C1 to generate the plasmids  
474 EGFP-Aux1, mCherry-Aux1, EGFP-GAK and mCherry-GAK. The kinase domain (residues 1-347 of  
475 GAK), PTEN-like domain (residues 1-419 of Aux1, residues 360-766 of GAK), clathrin-binding domain  
476 (residues 420-814 of Aux1; residues 767-1222 of GAK) and J domain (residues 815-910 of Aux1;  
477 residues 1223-1311 of GAK) were amplified by PCR from the full-length cDNA clones (Massol et al.,  
478 2006) and inserted into pEGFP-C1 to generate the EGFP-fused Aux1 or GAK truncations. These  
479 DNA segments were also fused by overlap PCR and inserted into pEGFP-C1 to generate the EGFP-  
480 Aux1/GAK chimera. All constructs used the linker (5'-  
481 GGAGGATCCGGTGGATCTGGAGGTTCTGGTGGTTCTGGTGGTTCC-3') placed between the DNA  
482 fragments and EGFP or mCherry.

483

484 Transfections were performed using TransfeX Transfection Reagent (ATCC, Manassas, VA)  
485 according to the manufacturer's instructions and cells with relatively low levels of protein expression  
486 were subjected to live cell imaging 16-20 hours after transfection.

487

488 **Genome editing of SUM159 cells to express EGFP-Aux1<sup>+/+</sup>, EGFP-GAK<sup>+/+</sup>, TagRFP-GAK<sup>+/+</sup>, or**  
489 **AP1-TagRFP<sup>+/+</sup> using the CRISPR/Cas9 approach**

490 SUM159 cells were gene-edited to incorporate EGFP or TagRFP to the N-terminus of Aux1 or GAK,  
491 or the C-terminus of AP1 sigma-1 subunit using the CRISPR/Cas9 approach (Ran et al., 2013). The  
492 target sequences overlapping the start codon ATG (underlined) at the genomic locus recognized by  
493 the single-guide RNA (sgRNA) are 5'-ATGAAAGATTCTGAAAATAA-3' for *DNAJC6* (encoding Aux1)  
494 and 5'-CGCCATGTCGCTGCTGCAGT-3' for *GAK*. The target sequence overlapping the stop codon  
495 TAG (underlined) at the genomic locus recognized by the sgRNA is GGTTTGGCATAGCCCCTGCT  
496 for *AP1S1*. The sgRNA containing the targeting sequence was delivered as PCR amplicons  
497 containing a PCR-amplified U6-driven sgRNA expression cassette (Ran et al., 2013).

498  
499 The donor constructs EGFP-Aux1 and EGFP-GAK used as templates for homologous recombination  
500 to repair the Cas9-induced double-strand DNA breaks were generated by cloning into the pCR8/GW  
501 TOPO vector with two ~800-nucleotide fragments of human genomic DNA upstream and downstream  
502 of the start codon of *DNAJC6* or *GAK* and the open reading frame of EGFP by TA ligation cloning.  
503 The upstream and downstream genomic fragments were generated by PCR amplification reactions  
504 from the genomic DNA extracted from SUM159 cells using the QiaAmp DNA mini kit (Qiagen). The  
505 open reading frame encoding EGFP together with a flexible linker (5'-  
506 GGAGGTTCTGGTGGTTCTGGTGGTTCC-3') was obtained by PCR from an EGFP expression  
507 vector.

508  
509 The donor constructs TagRFP-GAK and AP1-TagRFP were generated by cloning into the pUC19  
510 vector with two ~800-nucleotide fragments of human genomic DNA upstream and downstream of the  
511 start codon of *GAK* or the stop codon of *AP1S1* and the open reading frame of TagRFP using the  
512 Gibson Assembly Master Mix (New England BioLabs). The open reading frames encoding TagRFP  
513 together with a flexible linker (5'-GGAGGATCCGGTGGATCTGGAGGTTCT-3') were obtained by  
514 PCR from a TagRFP expression vector.

515  
516 Clonal cell lines expressing EGFP-Aux1<sup>+/+</sup>, EGFP-GAK<sup>+/+</sup>, TagRFP-GAK<sup>+/+</sup>, or AP1-TagRFP<sup>+/+</sup> was  
517 generated as described (He et al., 2017). In brief, SUM159 were transfected with 800 ng each of the  
518 donor plasmid, the plasmid coding for the *Streptococcus pyogenes* Cas9 and the free PCR product  
519 using Lipofectamin2000 (Invitrogen) according to the manufacturer's instruction. Then the cells  
520 expressing EGFP or TagRFP chimeras were enriched by fluorescence-activated cell sorting (FACS)  
521 using a FACS Aria II instrument (BD Biosciences), and further subjected to single cell sorting to select  
522 monoclonal cell populations. The cells with successful incorporation in the genomic locus of EGFP or  
523 TagRFP were screened by PCR using GoTaq Polymerase (Promega).

524

525 **Knockout of GAK using the CRISPR/Cas9 approach**

526 Knockout of GAK was performed using the CRISPR/Cas9 approach exactly as described before (He  
527 et al., 2017) except that the target sequence for GAK overlapping the start codon ATG (underlined) is  
528 5'-CGCCATATGTCGCTGCTGCAGT-3'.

529  
530 **mRNA depletion of Aux1 and GAK by shRNA or siRNA knockdown.**

531 Lentivirus shRNA expressing 5'-CACTTATGTTACCTCCAGAAT-3' or 5'-  
532 GAAGATCTGTTGTCCAATCAA-3' was used to knock down the expression of Aux1 or GAK (Broad  
533 Institute TRC library) as described before (He et al., 2017); 5'-CCTAAGGTTAAGTCGCCCTCG-3'  
534 was used as control. Alternatively, siRNAs were used to knockdown Aux1 or GAK using  
535 Lipofectamine RNAiMAX (Invitrogen). siGENOME SMARTpool (a mixture of four siRNAs) was used to  
536 knockdown GAK (M-005005-02-0005; Dharmacon); a single siGENOME siRNA was used to  
537 knockdown Aux1 (D-009885-02-0010; Dharmacon). A non-targeting siRNA (D-001210-03-05;  
538 Dharmacon) was used as a control. Knockdown of Aux1 or GAK by siRNA was achieved by two  
539 sequential transfections, the first one in cells after overnight plating and the second two days later,  
540 followed by analysis during the fourth day.

541  
542 **Transferrin uptake by flow cytometry**

543 Transferrin uptake by a flow cytometry–based assay was done as described (Cocucci et al., 2014).  
544

545 **Western blot analysis**

546 Western blot analysis was performed as described (Cocucci et al., 2012) using the anti-GAK antibody  
547 (1:500) or anti-Aux1/GAK antibody (1:500) diluted in Tris-buffered saline with Tween 20 containing 3%  
548 BSA.

549  
550 **TIRF microscopy and spinning disk confocal microscopy: live-cell imaging and image analysis**

551 The TIRF and spinning disk confocal microscopy experiments were as described (Cocucci et al.,  
552 2012). The single EGFP or TagRFP molecule calibration was carried out as described before  
553 (Cocucci et al., 2012; Cocucci et al., 2014). Recombinant EGFP made in *E. Coli* was used to  
554 determine the fluorescence intensity of a single EGFP molecule. The cytosol from gene-edited  
555 SUM159 cells expressing AP2-TagRFP<sup>+/+</sup> was used to determine the fluorescence intensity of a  
556 single TagRFP molecule.

557  
558 The detection and tracking of all fluorescent traces was carried out using the cmeAnalysis software  
559 package (Aguet et al., 2013). For the automated detection, the minimum and maximum tracking  
560 search radius were 1 and 3 pixels, and the maximum gap length in a trajectory was 2 frames (He et  
561 al., 2017). Detection of an independent event was verified by establishing absence of significant



562 signal during brief intervals preceding and following the first and last detected signals. The intensity-  
563 lifetime cohorts were generated as described (Aguet et al., 2013). Detection and tracking of clathrin-  
564 coated structures and the associated Aux1 or GAK were carried out with clathrin or AP2 as the  
565 “master” and Aux1/GAK as the “slave” channel. The valid clathrin or AP2 traces with significant  
566 Aux1/GAK signal in the slave channel were selected automatically and verified manually. The  
567 amplitude of the 2-D Gaussian PSF fitting for the detected EGFP-Aux1 or EGFP-GAK was used to  
568 estimate the number of EGFP-Aux1 or EGFP-GAK molecules calibrated by the intensity of single  
569 EGFP. Detection and tracking of events in cells expressing only fluorescently tagged Aux1, GAK or  
570 lipid sensors were carried out with the following combinations of master and slave channels:  
571 PtdIns(4)P sensor/PtdIns(3)P sensor, PtdIns(3)P sensor/Aux1, PtdIns(4)P sensor/Aux1, PtdIns(3)P  
572 sensor/GAK, PtdIns(4)P sensor/GAK (Fig. 3a,c,d), EGFP-Aux1/TagRFP-GAK and mCherry-  
573 Aux1/EGFP-Aux1 (Fig. 3b,e), respectively. The validity of traces was verified manually. The frame  
574 associated with the maximum fluorescence intensities for these traces and the corresponding interval  
575 for each pair was determined automatically.

#### 576 577 **Lattice light-sheet microscopy: live-cell imaging and image analysis**

578 To show the subcellular localization of Aux1 and GAK in the whole cell volume, the gene-edited  
579 EGFP-Aux1<sup>+/+</sup> and CLTA-TagRFP<sup>+/+</sup> cells, the gene-edited EGFP-GAK<sup>+/+</sup> and CLTA-TagRFP<sup>+/+</sup> cells,  
580 and the EGFP-GAK<sup>+/+</sup> and AP1-TagRFP cells were imaged using lattice light-sheet microscopy with a  
581 dithered square lattice light-sheet (Aguet et al., 2016; Chen et al., 2014). The cells were plated on 5  
582 mm coverslips (Bellco Glass, Vineland, NJ) for at least 4 hours prior to imaging, and were imaged in  
583 FluoroBrite™ DMEM media (Thermo Fisher Scientific, Rockford, IL) containing 5% FBS and 20 mM  
584 HEPES at 37°C. The cells were sequentially excited with a 488 nm laser (300 mW) and a 560 nm  
585 laser (10-50 mW) for ~100 ms for each channel using a 0.35 inner and 0.4 outer numerical aperture  
586 excitation annulus. The 3D volumes of the whole cells were recorded by scanning the sample at 250  
587 nm step sizes in the s-axis (corresponding to ~131 nm along the z-axis), thereby capturing a volume  
588 of ~50 μm x 50 μm x 75 μm (512 x 512 x 300 pixels).

589  
590 To track the dynamic recruitment of Aux1 or GAK in 3D, the gene-edited EGFP-Aux1<sup>+/+</sup> and AP2-  
591 TagRFP<sup>+/+</sup> cells, and the gene-edited EGFP-GAK<sup>+/+</sup> and AP2-TagRFP<sup>+/+</sup> cells, and the EGFP-GAK<sup>+/+</sup>  
592 and AP1-TagRFP cells were imaged using lattice light-sheet microscopy. The cells were excited with  
593 a 488 nm laser for ~50 ms using a 0.505 inner and 0.6 outer numerical aperture excitation annulus.  
594 The 3D volumes of the imaged cells were recorded by scanning the sample every ~2.1 s for 187 s at  
595 500 nm step sizes in the s-axis (corresponding to ~261 nm along the z-axis), thereby capturing a  
596 volume of ~50 μm x 50 μm x 15 μm (512 x 512 x 40 pixels).

597

598 ***In vitro* single-object uncoating**

599 ***Protein production***

600 The procedures to generate recombinant clathrin heavy chain produced in Sf9 cells, light chain  
601 produced in *E. coli* were as described (Bocking et al., 2011; Bocking et al., 2018). Labeling of light  
602 chain labeled with Alexa Fluor 488 and incorporation into recombinant clathrin triskelions were as  
603 described (Bocking et al., 2011). Recombinant Hsc70 and  $\Delta$ PTEN-Aux1 were produced in *E. coli* and  
604 prepared as described (Rapoport et al., 2008).

605

606 The DNA sequences encoding full-length bovine Aux1 and full-length human GAK were flanked at the  
607 N-terminal (for Aux1) or C-terminal (for GAK) by 6x-His tags upon insertion into the pFastBac vector.  
608 Proteins were produced intracellularly in Sf9 cells following the Bac-to-Bac protocol (ThermoFisher  
609 Scientific). Cells were lysed by sonication or using a ball bearing bore homogenizer. Lysates were  
610 ultracentrifuged, and the supernatant was applied to nickel-NTA resin. Proteins were eluted with  
611 imidazole. Aux1 was further purified by gel filtration chromatography and concentrated using Millipore  
612 centrifugal devices.

613

614 ***Preparation of YQRL peptidolipids***

615 The CKVTRRPKASDYQRLNL peptidolipid was prepared by adapting a previously described  
616 procedure (Bocking et al., 2018; Kelly et al., 2014). Briefly, a mixture of 20 mg/ml of YQRL containing  
617 peptide (prepared in 20 mM HEPES buffer pH 7.4), DMSO and maleimide-DOPE (1:1:2 v/v mixture  
618 respectively) was vortexed at 1000 rpm for 2 hours. The coupling reaction was quenched using 10  
619 mM  $\beta$ -mercaptoethanol for 30 min. The YQRL peptidolipid was extracted by adding chloroform,  
620 methanol, and water (4:3:2.25 v/v mixture) followed by centrifugation at 1000 rpm for 5 min. The  
621 organic phase containing the peptidolipid was dried under argon and stored in a sealed argon  
622 atmosphere-containing vial. The films were re-suspended in chloroform and methanol mixture (2:1) at  
623 2 mg/ml prior to use for liposome lipid film preparation.

624

625 ***Liposome preparation***

626 All lipids (Avanti Polar Lipids, Alabaster, AL) were mixed in 20:9:1 chloroform:methanol:water and  
627 dried to prepare composition specific lipid films. Prior to formation of the synthetic clathrin-coated  
628 vesicles, the lipid film aliquots were hydrated in coated vesicle formation buffer (20 mM MES Hydrate  
629 pH 6.5, 100 mM NaCl, 2 mM EDTA, 0.4 mM DTT) to 300  $\mu$ M final concentration and liposomes  
630 extruded with a 50 nm diameter pore filter.

631

632 ***In vitro reconstitution of synthetic clathrin-coated vesicles***

633 The following procedure, used to generate synthetic clathrin/AP2 coated vesicles (sCCVs) (Bocking et  
634 al., 2018), was based on the co-assembly of a clathrin and AP2 coat surrounding liposomes: a  
635 solution containing recombinant clathrin heavy chain and fluorescently labeled light chain (1:3 mol/mol  
636 ratio) and AP2 (3:1 w/w clathrin:AP2) (100 ug of clathrin heavy chain) was added to 15 ul of extruded  
637 liposomes (300 umol lipid /300 µl) made of 86.9% DOPC, 5% PtdIns(4,5)P<sub>2</sub>, 5% PtdIns(4)P or  
638 PtdIns(3)P, 3% YQRL DOPE peptidolipid, 0.1% DiI or DiD lipid dye and dialyzed overnight at 4 °C  
639 against coated vesicle formation buffer (80mM MES pH 6.5, 20mM NaCl, 2mM EDTA, 0.4mM DTT)  
640 using a Slide-A-Lyzer mini dialysis device (10K molecular weight cutoff, Thermo Fisher Scientific)  
641 followed by for an additional 4 hours of dialysis using fresh coated vesicle formation buffer. Large  
642 aggregates were removed by centrifugation using a bench top Eppendorf centrifuge at 4 °C for 10 min  
643 at maximum speed. The supernatant was then transferred to a fresh tube and centrifuged at high  
644 speed in a TLA-100.4 centrifuge (Beckman) at 70000 rpm for 30 min. The sCCV-containing pellet was  
645 re-suspended in coated vesicle formation buffer and centrifuged a second time at 70000 rpm for 30  
646 min. The pellet was re-suspended using coated vesicle formation buffer (100 µl of buffer per 100 µg of  
647 clathrin heavy chain) and stored at 4 °C for up to one week.

648

#### 649 ***Transmission electron microscopy***

650 sCCVs were adsorbed for 60 s onto freshly glow-discharged carbon coated electron microscope  
651 grids, washed with a few drops of Milli-Q water, stained for 30 s with a few drops 1.2% uranyl acetate  
652 and blot dried. The samples were imaged on a Tencai G<sup>2</sup> Spirit BioTWIN (FEI, Hillsboro, OR) at  
653 23000-49000 x magnification.

654

#### 655 ***Microfluidic uncoating chamber preparation***

656 Microfluidic chips (Bocking et al., 2011; Bocking et al., 2018) with PDMS plasma bonded to glass  
657 coverslips suited for TIRF microscopy were employed to efficiently deliver reagents to uncoat  
658 immobilized sCCVs. Glass coverslips (#1.5) were cleaned for a total of 20 min by sequential  
659 incubation in the following solvents: Toluene, Dichloromethane, Ethanol, Ethanol:Hydrochloric Acid  
660 (1:1 v/v), and Milli-Q water. The clean coverslips were oxygen plasma treated and bonded to PDMS  
661 channels. These chips were immediately incubated with 1 mg/ml biotinylated PLL-PEG for 5 min,  
662 washed with Milli-Q water, and treated with streptavidin (20 µl of 1 mg/ml streptavidin dissolved in  
663 PBS added to 80 µl 20 mM Tris pH 7.5, 2 mM EDTA, 50 mM NaCl) for 5 min. The chips were  
664 functionalized with CVC.6 biotinylated antibody specific for clathrin light chain A as previously  
665 described (Bocking et al., 2011; Bocking et al., 2014).

666

#### 667 ***In vitro uncoating of synthetic clathrin-coated vesicles***

668 sCCVs were bound to the functionalized upper surface of the glass cover slip and those that failed to  
669 attach washed away by flowing uncoating buffer (20 mM imidazole pH 6.8, 100 mM KCl, 2 mM MgCl<sub>2</sub>,  
670 5 mM protocatechuic acid, 50 nM protocatechuate-3,4-dioxygenase, 2 mM Trolox, 8 mM 4-  
671 Nitrobenzyl Alcohol). Disassembly of the clathrin/AP2 coats was caused with uncoating buffer  
672 supplemented with 1 μM Hsc70, 5 mM ATP, 10 mM MgCl<sub>2</sub> and the appropriate auxilins (typically 25  
673 nM of ΔPTEN-Aux1, full length Aux1 or full length GAK) flown through the chip at 20 μl/min.

674

675 The total internal fluorescence angle was set to the value that led to 80% of the maximal fluorescence  
676 signal observed for immobilized clathrin/AP2 coats and sCCVs before uncoating. The clathrin signal  
677 was monitored by exciting the Alexa Fluor 488 maleimide covalently linked to the clathrin light chain  
678 (Bocking et al., 2011). Time series starting 10 s prior to the uncoating mix and lasting 150 s were then  
679 recorded at an interval of 1s. Liposomes containing PtdIns(4)P- or PtdIns(3)P were independently  
680 labeled with Dil and DiD (Thermo Fisher Scientific) lipid dyes and detected by excitation at 561 nm  
681 and 640 nm, respectively. Signals from empty clathrin coats, PtdIns(3)P- and PtdIns(4)P-containing  
682 coated vesicles were classified using the 2D point source detector previously described (Aguet et al.,  
683 2013). The start of uncoating (the time point marking the onset of loss of the clathrin fluorescence  
684 signal) was manually curated for all traces included in the analysis.

685

#### 686 **Statistical tests**

687 Because the large size of the sample sizes, the Cohen's *d* effect size (Cohen, 1988) was used to  
688 report the practical significance of the difference in the magnitude between the recruited EGFP-Aux1  
689 or EGFP-GAK molecules and the lifetime of coated pits before and after the knockout or knockdown  
690 of GAK and Aux1. To compare the means from the cells with different treatments, the two-tailed *t*-test  
691 or one-way ANOVA was used as indicated in figure legends.

692

#### 693 **ACKNOWLEDGMENTS**

694 We thank S. Sever for the Aux1/GAK antibody gift and Justin R. Houser for maintaining the TIRF and  
695 spinning disc microscopes. We specially thank S.C. Harrison for discussions and editorial help. We  
696 also thank members of our laboratory for help and encouragement. E.S. was supported by grants  
697 from the National Natural Science Foundation (Grant No. 31270884) and by the Youth Innovation  
698 Promotion Association, Chinese Academy of Sciences. T.K. acknowledges support from the Janelia  
699 Visitor Program and Eric Betzig, Eric Marino, Tsung-Li Liu and Wesley R. Legant for help and advice  
700 in constructing and installing the lattice light-sheet microscope. Construction of the lattice light-sheet  
701 microscope was supported by grants from Biogen and Ionis Pharmaceuticals to T.K. The research  
702 was supported by NIH grant NIH R01 GM075252 to T.K.

703

704 **AUTHOR CONTRIBUTIONS**

705 K.H., E.S. and T.K. designed experiments; K.H., E.S. and S.D. generated the gene-edited cell lines  
706 and collected the imaging data using TIRF and spinning disk confocal microscopies; K.H. E.S. and  
707 S.D analyzed the data collected using TIRF and spinning disk confocal microscopies; S.U. and W.S.  
708 collected the imaging data using the lattice light-sheet microscope; S.U. and K.H. analyzed the  
709 imaging data from the lattice light-sheet microscope; K.H. E.S. and S.D generated the constructs for  
710 ectopic expression of proteins; M.M., R.G. and E.S. generated the constructs for genome editing;  
711 S.U., K.B., B.C. I.R, and I.K. participated in the preparation of reagents and acquisition of data  
712 associated with the *in vitro* single-object uncoating experiments. K.H. and T.K. contributed to the final  
713 manuscript in consultation with the authors.

714

715 **COMPETING FINANCIAL INTERESTS**

716 The authors declare no competing financial interests.

717 **REFERENCES**

- 718
- 719 Aguet, F., Antonescu, C.N., Mettlen, M., Schmid, S.L., and Danuser, G. (2013). Advances in analysis  
720 of low signal-to-noise images link dynamin and AP2 to the functions of an endocytic checkpoint. *Dev*  
721 *Cell* 26, 279-291.
- 722 Aguet, F., Upadhyayula, S., Gaudin, R., Chou, Y.Y., Cocucci, E., He, K., Chen, B.C., Mosaliganti, K.,  
723 Pasham, M., Skillern, W., *et al.* (2016). Membrane dynamics of dividing cells imaged by lattice light-  
724 sheet microscopy. *Mol Biol Cell*.
- 725 Ahle, S., and Ungewickell, E. (1990). Auxilin, a newly identified clathrin-associated protein in coated  
726 vesicles from bovine brain. *J Cell Biol* 111, 19-29.
- 727 Bocking, T., Aguet, F., Harrison, S.C., and Kirchhausen, T. (2011). Single-molecule analysis of a  
728 molecular disassemblase reveals the mechanism of Hsc70-driven clathrin uncoating. *Nat Struct Mol*  
729 *Biol* 18, 295-301.
- 730 Bocking, T., Aguet, F., Rapoport, I., Banzhaf, M., Yu, A., Zeeh, J.C., and Kirchhausen, T. (2014). Key  
731 interactions for clathrin coat stability. *Structure* 22, 819-829.
- 732 Bocking, T., Upadhyayula, S., Rapoport, I., Capraro, B.R., and Kirchhausen, T. (2018). Reconstitution  
733 of Clathrin Coat Disassembly for Fluorescence Microscopy and Single-Molecule Analysis. *Methods*  
734 *Mol Biol* 1847, 121-146.
- 735 Borner, G.H., Antrobus, R., Hirst, J., Bhumbra, G.S., Kozik, P., Jackson, L.P., Sahlender, D.A., and  
736 Robinson, M.S. (2012). Multivariate proteomic profiling identifies novel accessory proteins of coated  
737 vesicles. *J Cell Biol* 197, 141-160.
- 738 Braell, W.A., Schlossman, D.M., Schmid, S.L., and Rothman, J.E. (1984). Dissociation of clathrin  
739 coats coupled to the hydrolysis of ATP: role of an uncoating ATPase. *J Cell Biol* 99, 734-741.
- 740 Chang-Ileto, B., Frere, S.G., Chan, R.B., Voronov, S.V., Roux, A., and Di Paolo, G. (2011).  
741 Synaptojanin 1-mediated PI(4,5)P2 hydrolysis is modulated by membrane curvature and facilitates  
742 membrane fission. *Dev Cell* 20, 206-218.
- 743 Chen, B.C., Legant, W.R., Wang, K., Shao, L., Milkie, D.E., Davidson, M.W., Janetopoulos, C., Wu,  
744 X.S., Hammer, J.A., 3rd, Liu, Z., *et al.* (2014). Lattice light-sheet microscopy: imaging molecules to  
745 embryos at high spatiotemporal resolution. *Science* 346, 1257998.
- 746 Cocucci, E., Aguet, F., Boulant, S., and Kirchhausen, T. (2012). The first five seconds in the life of a  
747 clathrin-coated pit. *Cell* 150, 495-507.
- 748 Cocucci, E., Gaudin, R., and Kirchhausen, T. (2014). Dynamin recruitment and membrane scission at  
749 the neck of a clathrin-coated pit. *Mol Biol Cell* 25, 3595-3609.
- 750 Cohen, J. (1988). *Statistical power analysis for the behavioral sciences*, 2nd edn (Hillsdale, N.J.: L.  
751 Erlbaum Associates).
- 752 Cremona, O., Di Paolo, G., Wenk, M.R., Luthi, A., Kim, W.T., Takei, K., Daniell, L., Nemoto, Y.,  
753 Shears, S.B., Flavell, R.A., *et al.* (1999). Essential role of phosphoinositide metabolism in synaptic  
754 vesicle recycling. *Cell* 99, 179-188.
- 755 Ehrlich, M., Boll, W., Van Oijen, A., Hariharan, R., Chandran, K., Nibert, M.L., and Kirchhausen, T.  
756 (2004). Endocytosis by random initiation and stabilization of clathrin-coated pits. *Cell* 118, 591-605.
- 757 Eisenberg, E., and Greene, L.E. (2007). Multiple roles of auxilin and hsc70 in clathrin-mediated  
758 endocytosis. *Traffic* 8, 640-646.
- 759 Forozan, F., Veldman, R., Ammerman, C.A., Parsa, N.Z., Kallioniemi, A., Kallioniemi, O.P., and  
760 Ethier, S.P. (1999). Molecular cytogenetic analysis of 11 new breast cancer cell lines. *Br J Cancer* 81,  
761 1328-1334.

- 762 Fotin, A., Cheng, Y., Grigorieff, N., Walz, T., Harrison, S.C., and Kirchhausen, T. (2004a). Structure of  
763 an auxilin-bound clathrin coat and its implications for the mechanism of uncoating. *Nature* **432**, 649-  
764 653.
- 765 Fotin, A., Cheng, Y., Sliz, P., Grigorieff, N., Harrison, S.C., Kirchhausen, T., and Walz, T. (2004b).  
766 Molecular model for a complete clathrin lattice from electron cryomicroscopy. *Nature* **432**, 573-579.
- 767 Greener, T., Zhao, X., Nojima, H., Eisenberg, E., and Greene, L.E. (2000). Role of cyclin G-  
768 associated kinase in uncoating clathrin-coated vesicles from non-neuronal cells. *J Biol Chem* **275**,  
769 1365-1370.
- 770 Guan, R., Dai, H., Harrison, S.C., and Kirchhausen, T. (2010). Structure of the PTEN-like region of  
771 auxilin, a detector of clathrin-coated vesicle budding. *Structure* **18**, 1191-1198.
- 772 He, K., Marsland, R., III, Upadhyayula, S., Song, E., Dang, S., Capraro, B.R., Wang, W., Skillern, W.,  
773 Gaudin, R., Ma, M., *et al.* (2017). Dynamics of phosphoinositide conversion in clathrin-mediated  
774 endocytic traffic. *Nature* **552**, 410-414.
- 775 Hirst, J., Sahlender, D.A., Li, S., Lubben, N.B., Borner, G.H., and Robinson, M.S. (2008). Auxilin  
776 depletion causes self-assembly of clathrin into membraneless cages in vivo. *Traffic* **9**, 1354-1371.
- 777 Hong, S.H., Cortesio, C.L., and Drubin, D.G. (2015). Machine-Learning-Based Analysis in Genome-  
778 Edited Cells Reveals the Efficiency of Clathrin-Mediated Endocytosis. *Cell Rep* **12**, 2121-2130.
- 779 Kametaka, S., Moriyama, K., Burgos, P.V., Eisenberg, E., Greene, L.E., Mattera, R., and Bonifacino,  
780 J.S. (2007). Canonical interaction of cyclin G associated kinase with adaptor protein 1 regulates  
781 lysosomal enzyme sorting. *Mol Biol Cell* **18**, 2991-3001.
- 782 Kelly, B.T., Graham, S.C., Liska, N., Dannhauser, P.N., Honing, S., Ungewickell, E.J., and Owen, D.J.  
783 (2014). Clathrin adaptors. AP2 controls clathrin polymerization with a membrane-activated switch.  
784 *Science* **345**, 459-463.
- 785 Kirchhausen, T., Owen, D., and Harrison, S.C. (2014). Molecular structure, function, and dynamics of  
786 clathrin-mediated membrane traffic. *Cold Spring Harb Perspect Biol* **6**, a016725.
- 787 Kulak, N.A., Pichler, G., Paron, I., Nagaraj, N., and Mann, M. (2014). Minimal, encapsulated  
788 proteomic-sample processing applied to copy-number estimation in eukaryotic cells. *Nat Methods* **11**,  
789 319-324.
- 790 Kural, C., Tacheva-Grigorova, S.K., Boulant, S., Cocucci, E., Baust, T., Duarte, D., and Kirchhausen,  
791 T. (2012). Dynamics of intracellular clathrin/AP1- and clathrin/AP3-containing carriers. *Cell Rep* **2**,  
792 1111-1119.
- 793 Lee, D.W., Wu, X., Eisenberg, E., and Greene, L.E. (2006). Recruitment dynamics of GAK and auxilin  
794 to clathrin-coated pits during endocytosis. *J Cell Sci* **119**, 3502-3512.
- 795 Lee, D.W., Zhao, X., Zhang, F., Eisenberg, E., and Greene, L.E. (2005). Depletion of GAK/auxilin 2  
796 inhibits receptor-mediated endocytosis and recruitment of both clathrin and clathrin adaptors. *J Cell*  
797 *Sci* **118**, 4311-4321.
- 798 Loerke, D., Mettlen, M., Yarar, D., Jaqaman, K., Jaqaman, H., Danuser, G., and Schmid, S.L. (2009).  
799 Cargo and dynamin regulate clathrin-coated pit maturation. *PLoS Biol* **7**, e57.
- 800 Ma, Y., Greener, T., Pacold, M.E., Kaushal, S., Greene, L.E., and Eisenberg, E. (2002). Identification  
801 of domain required for catalytic activity of auxilin in supporting clathrin uncoating by Hsc70. *J Biol*  
802 *Chem* **277**, 49267-49274.
- 803 Massol, R.H., Boll, W., Griffin, A.M., and Kirchhausen, T. (2006). A burst of auxilin recruitment  
804 determines the onset of clathrin-coated vesicle uncoating. *Proc Natl Acad Sci U S A* **103**, 10265-  
805 10270.

- 806 Nandez, R., Balkin, D.M., Messa, M., Liang, L., Paradise, S., Czaplá, H., Hein, M.Y., Duncan, J.S.,  
807 Mann, M., and De Camilli, P. (2014). A role of OCRL in clathrin-coated pit dynamics and uncoating  
808 revealed by studies of Lowe syndrome cells. *Elife* 3, e02975.
- 809 Newmyer, S.L., Christensen, A., and Sever, S. (2003). Auxilin-dynamin interactions link the uncoating  
810 ATPase chaperone machinery with vesicle formation. *Dev Cell* 4, 929-940.
- 811 Park, B.C., Yim, Y.I., Zhao, X., Olszewski, M.B., Eisenberg, E., and Greene, L.E. (2015). The clathrin-  
812 binding and J-domains of GAK support the uncoating and chaperoning of clathrin by Hsc70 in the  
813 brain. *J Cell Sci* 128, 3811-3821.
- 814 Ran, F.A., Hsu, P.D., Wright, J., Agarwala, V., Scott, D.A., and Zhang, F. (2013). Genome  
815 engineering using the CRISPR-Cas9 system. *Nat Protoc* 8, 2281-2308.
- 816 Rapoport, I., Boll, W., Yu, A., Bocking, T., and Kirchhausen, T. (2008). A motif in the clathrin heavy  
817 chain required for the Hsc70/auxilin uncoating reaction. *Mol Biol Cell* 19, 405-413.
- 818 Rothnie, A., Clarke, A.R., Kuzmic, P., Cameron, A., and Smith, C.J. (2011). A sequential mechanism  
819 for clathrin cage disassembly by 70-kDa heat-shock cognate protein (Hsc70) and auxilin. *Proc Natl  
820 Acad Sci U S A* 108, 6927-6932.
- 821 Scheele, U., Alves, J., Frank, R., Duwel, M., Kalthoff, C., and Ungewickell, E. (2003). Molecular and  
822 functional characterization of clathrin- and AP-2-binding determinants within a disordered domain of  
823 auxilin. *J Biol Chem* 278, 25357-25368.
- 824 Scheele, U., Kalthoff, C., and Ungewickell, E. (2001). Multiple interactions of auxilin 1 with clathrin and  
825 the AP-2 adaptor complex. *J Biol Chem* 276, 36131-36138.
- 826 Schlossman, D.M., Schmid, S.L., Braell, W.A., and Rothman, J.E. (1984). An enzyme that removes  
827 clathrin coats: purification of an uncoating ATPase. *J Cell Biol* 99, 723-733.
- 828 Ungewickell, E. (1985). The 70-kd mammalian heat shock proteins are structurally and functionally  
829 related to the uncoating protein that releases clathrin triskelia from coated vesicles. *EMBO J* 4, 3385-  
830 3391.
- 831 Wang, Y.J., Wang, J., Sun, H.Q., Martinez, M., Sun, Y.X., Macia, E., Kirchhausen, T., Albanesi, J.P.,  
832 Roth, M.G., and Yin, H.L. (2003). Phosphatidylinositol 4 phosphate regulates targeting of clathrin  
833 adaptor AP-1 complexes to the Golgi. *Cell* 114, 299-310.
- 834 Wu, X., Zhao, X., Baylor, L., Kaushal, S., Eisenberg, E., and Greene, L.E. (2001). Clathrin exchange  
835 during clathrin-mediated endocytosis. *J Cell Biol* 155, 291-300.
- 836 Xing, Y., Bocking, T., Wolf, M., Grigorieff, N., Kirchhausen, T., and Harrison, S.C. (2010). Structure of  
837 clathrin coat with bound Hsc70 and auxilin: mechanism of Hsc70-facilitated disassembly. *EMBO J* 29,  
838 655-665.
- 839 Zhang, C.X., Engqvist-Goldstein, A.E., Carreno, S., Owen, D.J., Smythe, E., and Drubin, D.G. (2005).  
840 Multiple roles for cyclin G-associated kinase in clathrin-mediated sorting events. *Traffic* 6, 1103-1113.
- 841



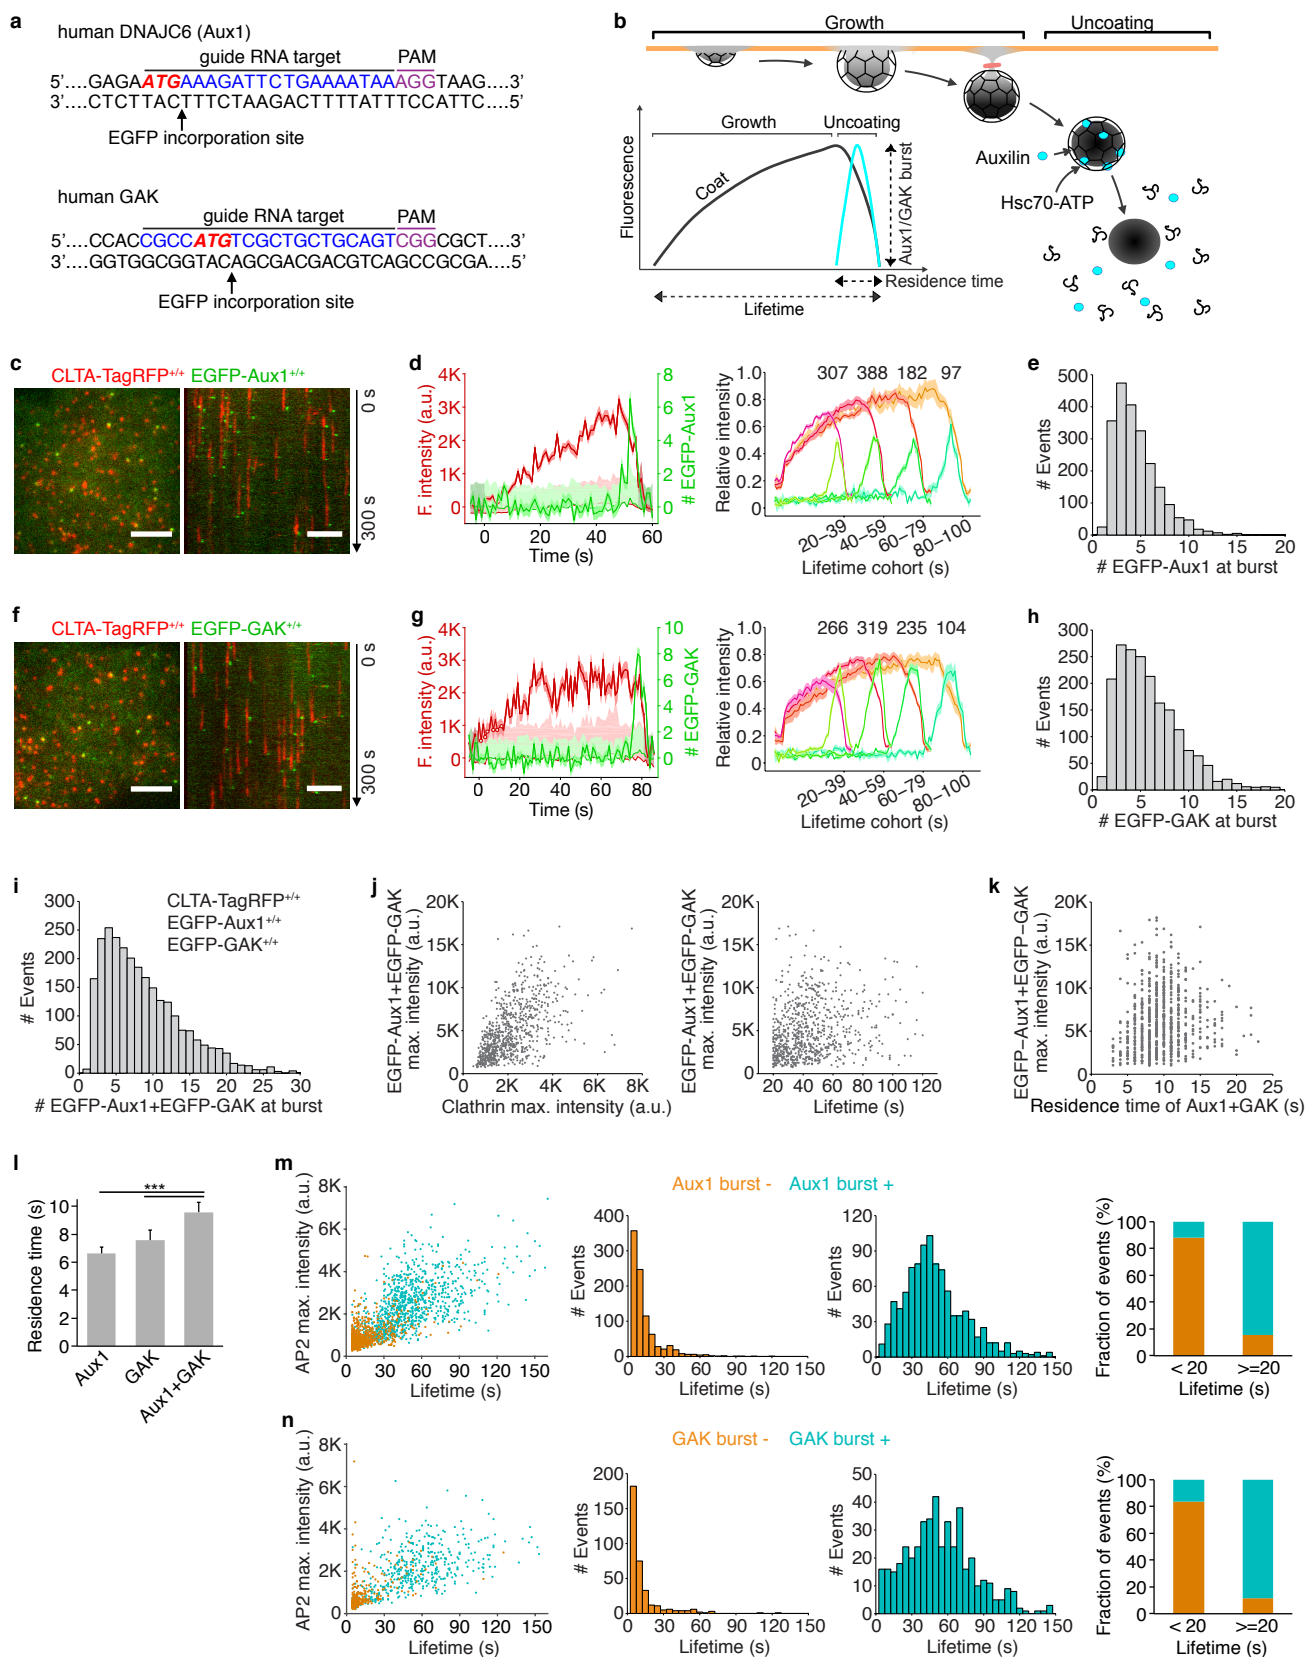

843 **Figure 1. Recruitment of Aux1 and GAK to clathrin-coated vesicles in genome-edited cells.**

844 (a) CRISPR/Cas9 gene-editing strategy used to incorporate EGFP at the N-terminus of Aux1 or GAK.  
845 The target sequence at the genomic locus of gene *DNAJC6* (Aux1) recognized by the single-guide  
846 RNA is highlighted. The protospacer adjacent motif (PAM), the start codon ATG (red) and the site of  
847 EGFP incorporation upon homologous recombination are highlighted.

848 (b) Schematic representation of the bursts of Aux1/GAK during uncoating of clathrin-coated vesicles  
849 (modified from Massol et al., 2006).

850 (c) Snapshot (left) and kymograph (right) from a representative TIRF microscopy time series showing  
851 transient burst recruitment of EGFP-Aux1 in coated vesicles containing CLTA-TagRFP in SUM159  
852 cell double gene-edited for EGFP-Aux1<sup>+/+</sup> and CLTA-TagRFP<sup>+/+</sup>. Time series with single molecule  
853 detection sensitivity for EGFP acquired for 300 s at 1-s intervals using 100 ms exposures. The  
854 kymograph was shifted laterally by 5 pixels. Scale bars, 5 μm.

855 (d) Left panel: Representative plot of a single endocytic event showing fluorescence intensity traces  
856 for CLTA-TagRFP and EGFP-Aux1 (arbitrary units for CLTA; number of molecules for Aux1) together  
857 with estimated uncertainties (one S.D., dark shade), corresponding local backgrounds (thin lines), and  
858 significance threshold above background (~2 S.D., light shade). Right panel: Averaged fluorescence  
859 intensity traces (mean ± S.E.) for CLTA-TagRFP and EGFP-Aux1 from endocytic clathrin-coated pits  
860 and vesicles automatically identified in eight cells and then grouped in cohorts according to lifetimes.  
861 The numbers of traces analyzed are shown above each cohort.

862 (e) Distribution of the maximum number of EGFP-Aux1 molecules recruited during the uncoating burst  
863 (2198 traces from 17 cells).

864 (f-h) Transient burst of EGFP-GAK in coated vesicles containing CLTA-TagRFP in SUM159 cell  
865 double gene-edited for EGFP-GAK<sup>+/+</sup> and CLTA-TagRFP<sup>+/+</sup>. Cohorts in **g** are from eight cells;  
866 distributions in **h** from 16 cells.

867 (i) Distribution of the maximum number of EGFP-Aux1 together with EGFP-GAK molecules recruited  
868 during uncoating of clathrin-coated vesicles (2636 traces) from 31 cells triple-edited for EGFP-Aux1<sup>+/+</sup>,  
869 EGFP-GAK<sup>+/+</sup> and CLTA-TagRFP<sup>+/+</sup>

870 (j) Scatter plots for the maximum fluorescence intensities of EGFP-Aux1 and EGFP-GAK (781 events)  
871 as a function of the maximum fluorescence intensity of CLTA-TagRFP (left) (Pearson correlation  
872 coefficient  $r = 0.569$ ) or lifetime of clathrin-TagRFP (right) (Pearson correlation coefficient  $r = 0.212$ )  
873 from nine cells triple-edited for EGFP-Aux1<sup>+/+</sup>, EGFP-GAK<sup>+/+</sup> and CLTA-TagRFP<sup>+/+</sup>.

874 (k) Scatter plots for the maximum fluorescence intensities of EGFP-Aux1 and EGFP-GAK (716  
875 events) as a function of the duration of Aux1 and GAK bursts (Pearson correlation coefficient  $r =$   
876  $0.132$ ) from nine cells triple-edited for EGFP-Aux1<sup>+/+</sup>, EGFP-GAK<sup>+/+</sup> and CLTA-TagRFP<sup>+/+</sup>.

877 (l) Duration of Aux1 and GAK bursts during uncoating of coated vesicles in cells gene-edited for  
878 EGFP-Aux1<sup>+/+</sup> (six cells, Aux1), EGFP-GAK<sup>+/+</sup> (five cells, GAK), or EGFP-Aux1<sup>+/+</sup> and EGFP-GAK<sup>+/+</sup>  
879 (nine cells, Aux1+GAK) together with CLTA-TagRFP<sup>+/+</sup>; \*\*\* $P < 0.001$  by one-way ANOVA with Tukey's  
880 comparison test.

881 (m) Left panel: Scatter plot for the maximum fluorescence intensities and lifetimes from AP2-TagRFP  
882 tracks with (996 traces) or without (919 traces) detectable EGFP-Aux1 burst, from nine cells double  
883 gene-edited for EGFP-Aux1<sup>+/+</sup> and AP2-TagRFP<sup>+/+</sup>. Middle panels: lifetime distributions from AP2-  
884 TagRFP tracks without or with detectable EGFP-Aux1 burst. Right panel: fraction of AP2 tracks of  
885 lifetime shorter or longer than 20 s with or without detectable EGFP-Aux1 burst.

886 (n) Left panel: Scatter plot for the maximum fluorescence intensities and lifetimes of AP2-TagRFP  
887 tracks with (467 traces) or without (350 traces) detectable EGFP-GAK burst, from six cells double  
888 gene-edited for EGFP-GAK<sup>+/+</sup> and AP2-TagRFP<sup>+/+</sup>. Middle panels: lifetime distributions from AP2-  
889 TagRFP tracks without or with detectable EGFP-GAK burst. Right panel: fraction of AP2 tracks of  
890 lifetime shorter or longer than 20 s with or without a detectable EGFP-GAK burst.

891

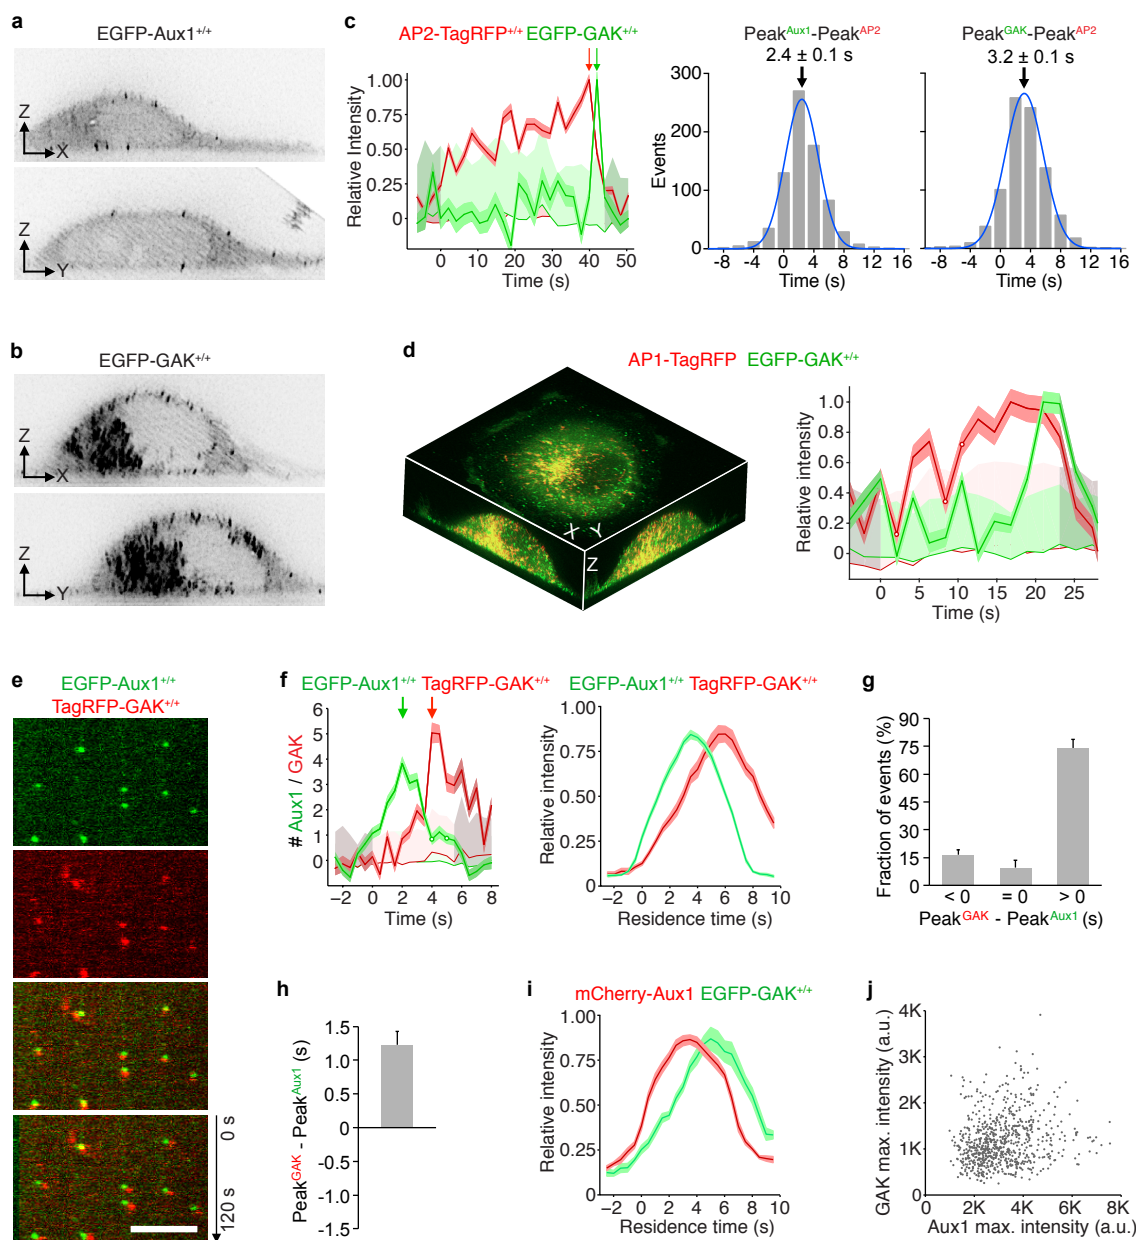

893 **Figure 2. Temporal and spatial distributions of Aux1 and GAK.**

894 (a) Maximum intensity projections from a thin 2  $\mu\text{m}$  optical section of a gene-edited cell expressing  
895 EGFP-Aux1 recorded in 3D by lattice light-sheet microscopy

896 (b) Maximum intensity projections from a thin 2  $\mu\text{m}$  optical section of a gene-edited cell expressing  
897 EGFP-GAK recorded in 3D by lattice light-sheet microscopy.

898 (c) Representative plot from 3D automated trackings of AP2-TagRFP and EGFP-Aux1 (872 traces  
899 from six cells), or AP2-TagRFP and EGFP-GAK (755 traces from six cells) in the double gene-edited  
900 cells imaged by lattice light-sheet microscopy. Distribution (fit with a single Gaussian) of the interval  
901 between maximum fluorescent signals for AP2 and Aux1 or AP2 and GAK ( $2.4 \pm 0.1$  s and  $3.2 \pm 0.1$   
902 s, mean  $\pm$  S.E., respectively).

903 (d) Distribution of GAK in cells gene-edited for EGFP-GAK<sup>+/+</sup> and stably expressing AP1-TagRFP  
904 recorded in 3D by lattice light-sheet microscopy. Left panel: Maximum intensity projections in X-Y, X-Z  
905 and Y-Z of EGFP-GAK and AP1-TagRFP from a 3D rendered cell. Right panel: Representative plot of  
906 EGFP-GAK recruitment to a single AP1-positive carrier.

907 (e) Snapshot from a representative TIRF microscopy time series showing the transient burst  
908 recruitment of EGFP-Aux1 and TagRFP-GAK<sup>+/+</sup> on the plasma membrane of a cell double gene-  
909 edited for EGFP-Aux1<sup>+/+</sup> and TagRFP-GAK<sup>+/+</sup>. Time series with single molecule detection sensitivity  
910 for EGFP and TagRFP acquired for 120 s at 1 s intervals using 100 ms exposures. Kymograph  
911 (bottom panel) shifted laterally by 5 pixels. Scale bars, 5  $\mu\text{m}$ .

912 (f) Representative plot (left panel) for a single endocytic event showing sequential recruitment of  
913 EGFP-Aux1 and TagRFP-GAK (recruitment peaks highlighted by arrows) imaged at 0.5 s intervals by  
914 TIRF microscopy. The traces (right panel) are averaged relative fluorescence intensity (mean  $\pm$  S.E.)  
915 of EGFP-Aux1 and TagRFP-GAK for the cohort of EGFP-Aux1 burst with residence times lasting  
916 between three and 12 s (1516 traces from eight cells).

917 (g) The relative timing differences ( $< 0$  s,  $= 0$  s and  $> 0$  s) between peaks of EGFP-Aux1 and  
918 TagRFP-GAK recruitment (mean  $\pm$  S.D.,  $n =$  eight cells).

919 (h) Distribution of interval between peaks of EGFP-Aux1 and TagRFP-GAK recruitment. The mean  
920 interval and S.D. from eight cells was  $1.34 \pm 0.26$  s.

921 (i) Averaged relative fluorescence intensity (mean  $\pm$  S.E.) for bursts of duration between three and 12  
922 s of transiently expressed mCherry-Aux1 and gene edited EGFP-GAK (1859 traces from eight cells).

923 (j) Scatter plot for the maximum fluorescence intensities of EGFP-Aux1 and TagRFP-GAK (750 traces  
924 from eight cells double gene-edited for EGFP-Aux1<sup>+/+</sup> and TagRFP-GAK<sup>+/+</sup>, Pearson correlation  
925 coefficient  $r = 0.189$ ).

926

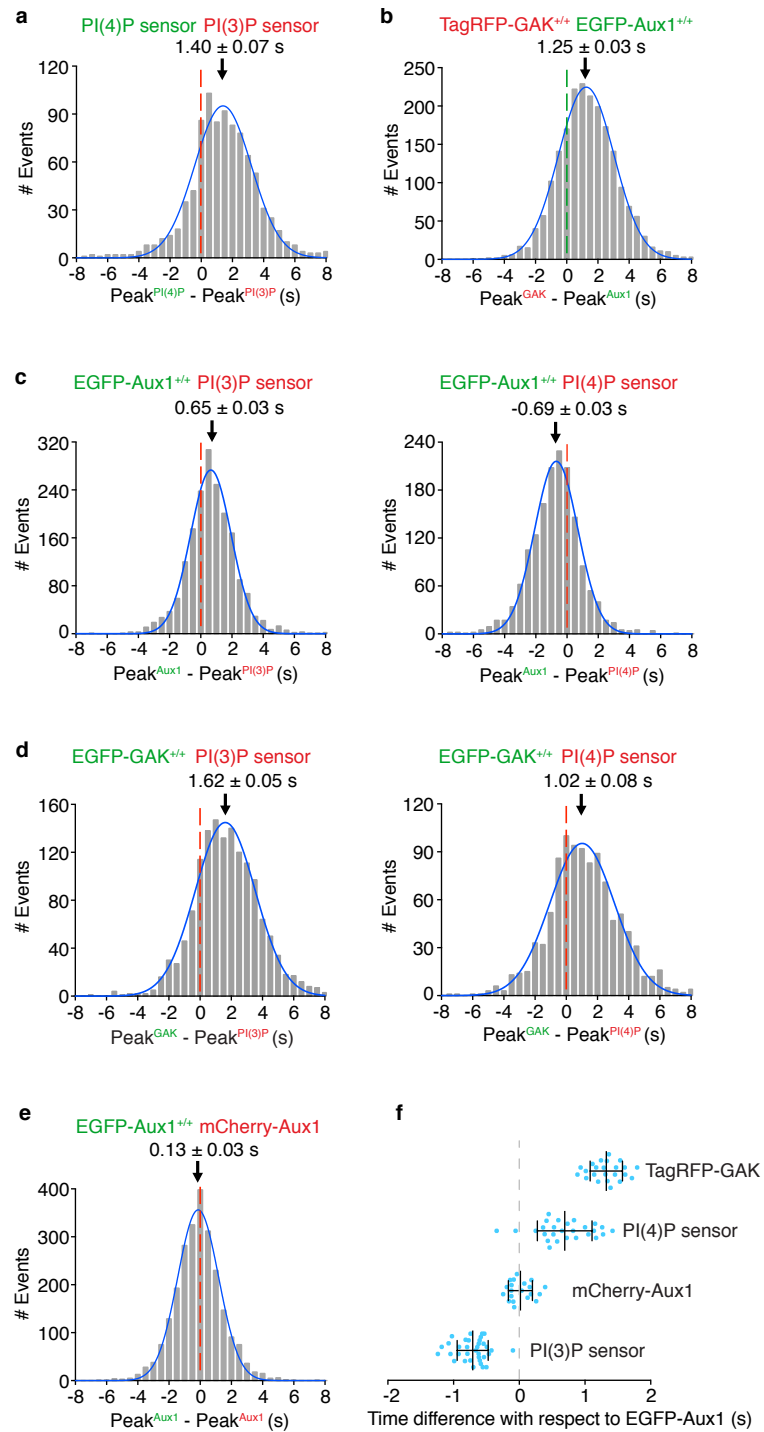

928 **Figure 3. Comparison of recruitment times of Aux1, GAK and phosphoinositide sensors to**  
929 **endocytic clathrin-coated vesicles.**

930 Bottom (adherent) surfaces of cells transiently expressing various combinations of Aux1, GAK and  
931 Aux1-based PtdIns(3)P and PtdIns(4)P sensors imaged by TIRF microscopy every 0.5 s for 100 s.

932 (a) Transient co-expression of the Aux1-based PtdIns(4)P (EGFP-P4M(DrrA)-Aux1) and PtdIns(3)P  
933 (mCherry-2xFYVE(Hrs)-Aux1) sensors in parental SUM159 cells. Distribution (fit with a single  
934 Gaussian) for the interval between the peaks within single events showing that the PtdIns(3)P sensor  
935 precedes the PtdIns(4)P sensor by  $1.40 \pm 0.07$  s (mean  $\pm$  S.E., 916 traces from 34 cells).

936 (b) Distribution for the interval between the peaks within single events of EGFP-Aux1 and TagRFP-  
937 GAK in cells double gene-edited for EGFP-Aux1<sup>+/+</sup> and TagRFP-GAK<sup>+/+</sup> ( $-1.25 \pm 0.03$  s, mean  $\pm$  S.E.,  
938 2033 traces from 23 cells).

939 (c) Transient expression of PtdIns(3)P (mCherry-2xFYVE (Hrs)-Aux1) or PtdIns(4)P (mCherry-P4M  
940 (DrrA)-Aux1) sensor in gene-edited EGFP-Aux1<sup>+/+</sup> cells. Distributions for the interval between burst  
941 peaks for Aux1 and the phosphoinositide sensors in the same event. Aux1 and PtdIns(3)P sensor:  
942  $0.65 \pm 0.03$  s, mean  $\pm$  S.E., 1863 traces in 35 cells; Aux1 and PtdIns(4)P sensor:  $-0.69 \pm 0.03$  s; 1570  
943 traces in 27 cells.

944 (d) Transient expression of PtdIns(3)P (mCherry-2xFYVE (Hrs)-Aux1) or PtdIns(4)P (mCherry-P4M  
945 (DrrA)-Aux1) sensors in gene-edited EGFP-GAK<sup>+/+</sup> cells. Distributions for the interval between burst  
946 peaks for GAK and the phosphoinositide sensors in the same event. GAK and PtdIns(3)P sensor  
947 ( $1.62 \pm 0.05$  s; 1435 traces in 36 cells); GAK and PtdIns(4)P sensor ( $1.02 \pm 0.08$  s; 1020 traces in 34  
948 cells).

949 (e) Transient expression of mCherry-Aux1 in gene-edited EGFP-Aux1<sup>+/+</sup> cells. Distributions for the  
950 interval between burst peaks for mCherry-Aux1 and EGFP-Aux1 in the same event ( $0.13 \pm 0.03$  s;  
951 2435 traces in 34 cells).

952 (f) Interval between burst peaks of Aux1 in gene edited EGFP-Aux1<sup>+/+</sup> cells and of gene edited  
953 TagRFP-GAK<sup>+/+</sup> (n = 23 cells), or of transiently expressed PtdIns(4)P sensor (mCherry-P4M(DrrA)-  
954 Aux1, n = 27 cells), of mCherry-Aux1 (n = 34 cells) or of PtdIns(3)P sensor (mCherry-2xFYVE(Hrs)-  
955 Aux1, n = 35 cells), respectively, where the value of each spot represents the average (mean  $\pm$  S.D)  
956 of the measurement obtained for a given single cell. The timing differences between the bursts for  
957 each group were statistically significant ( $P < 0.001$  by one-way ANOVA with Tukey's comparison test).

958

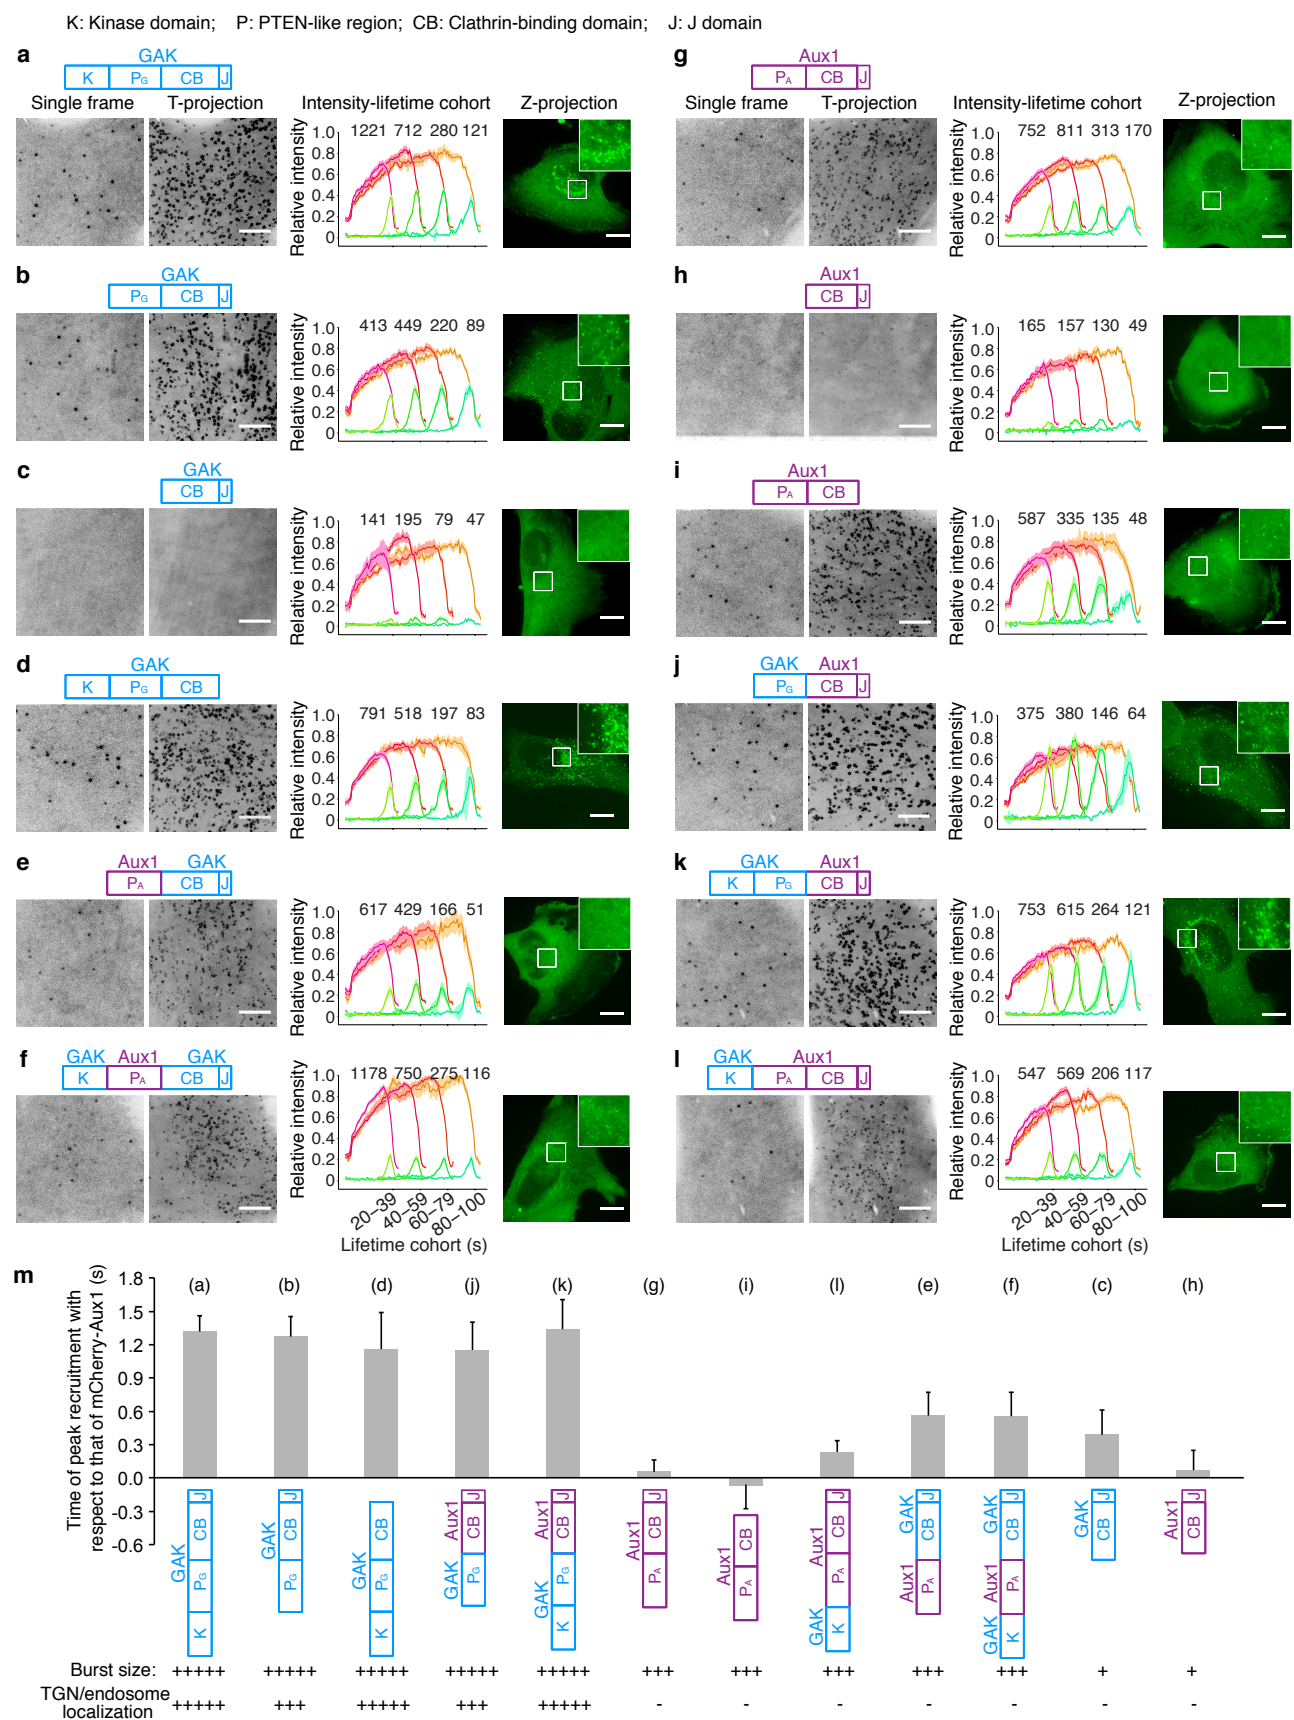

Figure 4



960 **Figure 4. PTEN-like domains influence the recruitment of Aux1 and GAK.**

961 Bottom surfaces of gene-edited CLTA-TagRFP<sup>+/+</sup> cells transiently expressing indicated EGFP-tagged  
962 constructs of Aux1 or GAK, imaged by TIRF microscopy every one s for 300 s; traces analyzed by  
963 automated 2D tracking.

964 (a-l) Each panel shows a schematic representation indicating the domain organization of the construct:  
965 K, kinase domain of GAK (amino acid residues 1-347); P<sub>A</sub> or P<sub>G</sub>, PTEN-like domain of GAK (360-766)  
966 or of Aux1 (1-419); CB, clathrin-binding domain of GAK (767-1222) or of Aux1 (420-814); J, J domain  
967 of GAK (1223-1311) or of Aux1 (815-910); a representative single frame and the corresponding  
968 maximum intensity time projection of the time series as a function of time (T-projection). The plots  
969 show averaged fluorescence intensity traces (mean ± S.E.) of CLTA-TagRFP (red) and EGFP-fused  
970 constructs (green), from 6-13 cells per condition, grouped by cohorts according to lifetimes. The  
971 numbers of analyzed traces are shown above each cohort. The cells were also imaged in 3D by  
972 spinning-disk confocal microscopy; the images at the right of each panel show representative  
973 maximum intensity z projections (Z-projection) from 34 sequential optical sections spaced 0.3 μm and  
974 include an enlarged region. Scale bars, 10 μm.

975 (m) Mean interval between the fluorescence maxima for the indicated EGFP-fused construct (diagram  
976 immediately below plot) and the mCherry-Aux1 burst (mean ± S.D., n = 8-14 cells), in cells imaged at  
977 0.5 s intervals for 60 s by TIRF microscopy. Below the construct schematics are qualitative estimates  
978 of the relative maximum amplitudes of fluorescence for the bursts at the plasma membrane and in  
979 regions of the TGN/endosome.

980

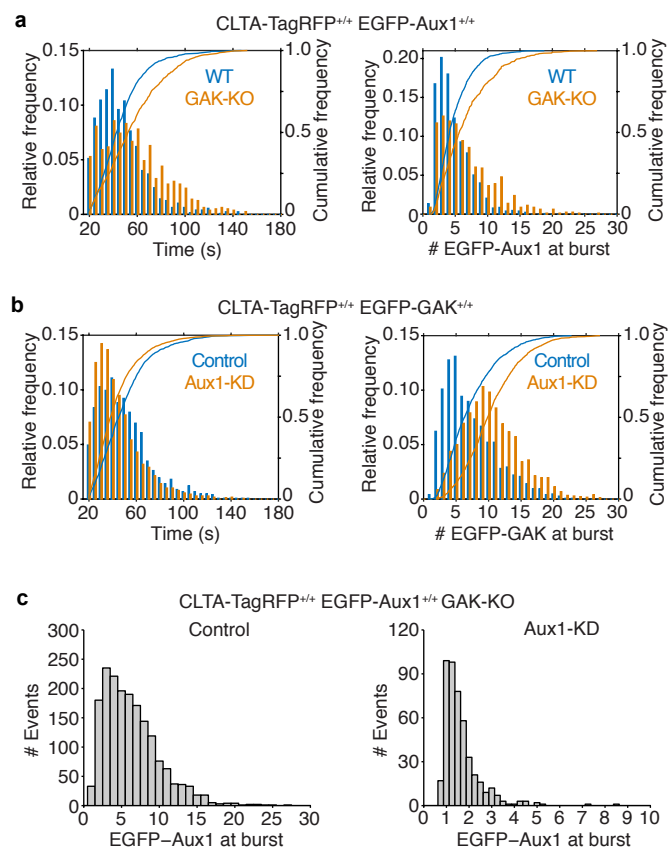

982 **Figure 5. Numbers of auxilin molecules during uncoating.**

983 (a) Effect of GAK knockout on recruitment of Aux1 to endocytic clathrin coated vesicles. GAK was  
984 eliminated by CRISPR/Cas9-targeted knockout in cells gene-edited for EGFP-Aux1<sup>+/+</sup> and CLTA-  
985 TagRFP<sup>+/+</sup>. Histogram and cumulative distributions showing significant increases in the number of  
986 EGFP-Aux1 molecules recruited during the burst (Cohen's  $d = 0.45$ ) and in the lifetime (Cohen's  $d =$   
987  $0.57$ ) of clathrin coated structures, determined in 1272 traces from 14 wild-type (WT) cells and in 794  
988 traces from 14 knockout (GAK-KO) cells.

989 (b) Effect of Aux1 knockdown by shRNA on recruitment of GAK to endocytic clathrin coated vesicles,  
990 in cells gene-edited for EGFP-GAK<sup>+/+</sup> and CLTA-TagRFP<sup>+/+</sup>. Histogram and cumulative distributions for  
991 the number of EGFP-Aux1 molecules recruited during the burst (Cohen's  $d = 0.73$ ) and the lifetimes of  
992 the clathrin coated structures (Cohen's  $d = 0.29$ ), determined in 1498 traces from 15 control cells and  
993 in 1793 traces from 14 knockdown (Aux1-KD) cells.

994 (c) Effect of GAK knockout and Aux1 knockdown by siRNA on recruitment of Aux1 to endocytic  
995 clathrin coated vesicles, in cells gene-edited for EGFP-Aux1<sup>+/+</sup> and CLTA-TagRFP<sup>+/+</sup> and knockout for  
996 GAK. Histogram distributions for the number of EGFP-Aux1 molecules recruited during the burst of  
997 clathrin coated structures, determined in 1794 traces from 20 control cells and in 465 traces from 47  
998 knockdown (Aux1-KD) cells.

999

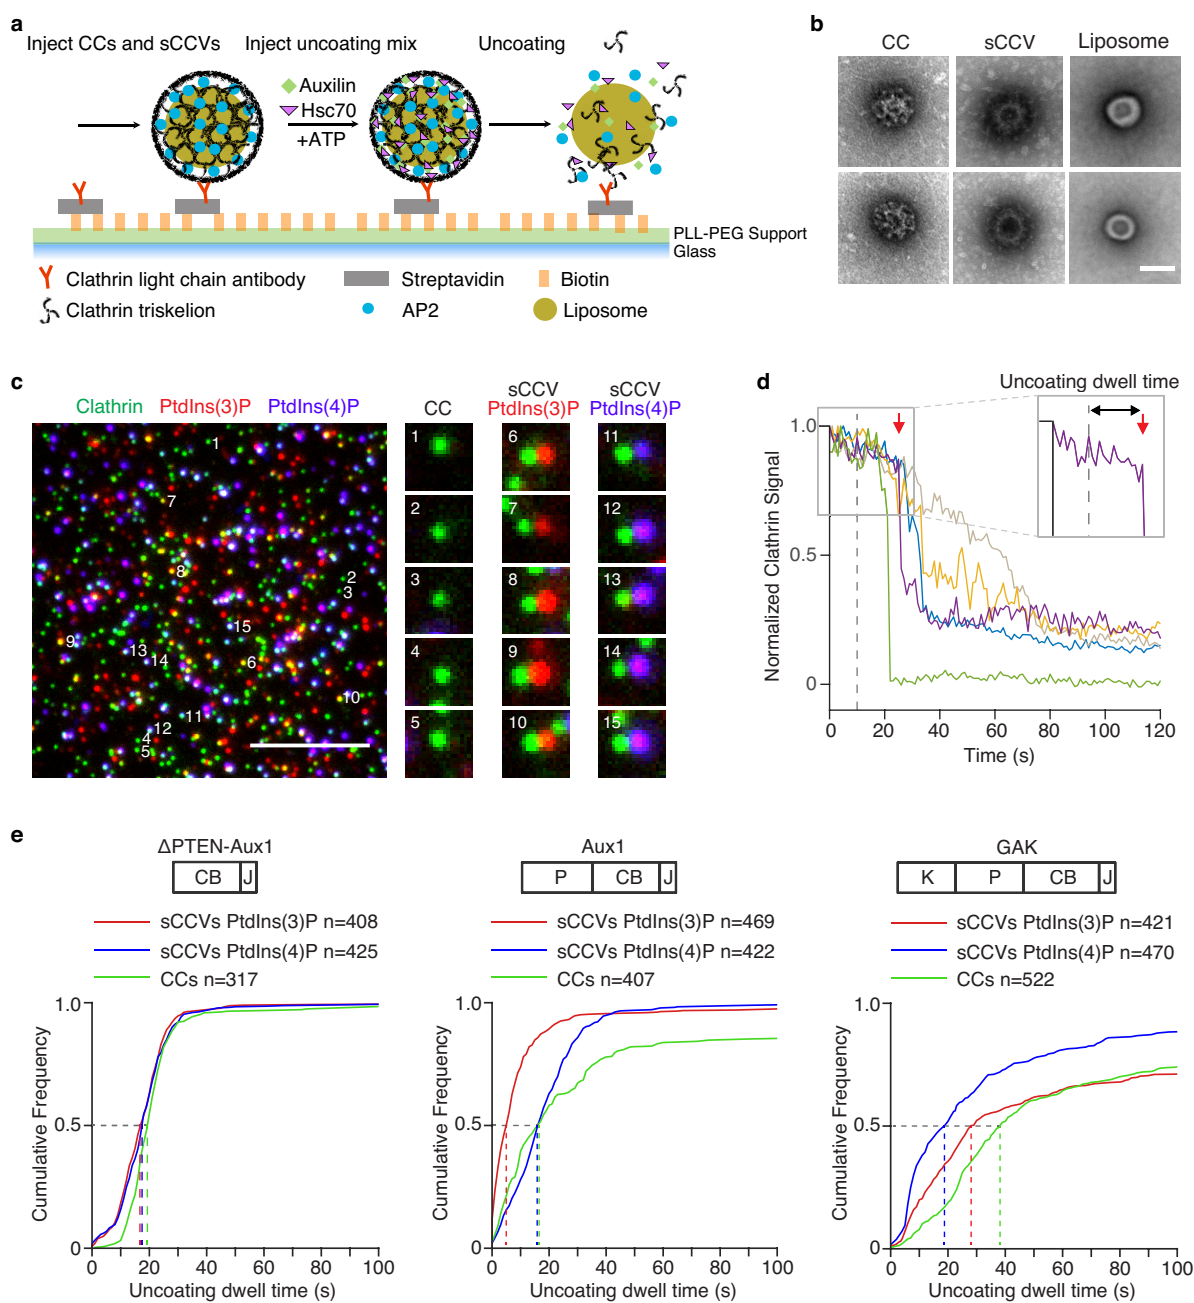

1001 **Figure 6. Single-object *in vitro* uncoating assay.**

1002 (a) Schematic representation of the single-object uncoating assay. The intensities of fluorescence  
1003 from labeled clathrin and of lipid dyes incorporated into liposomes surrounded by clathrin/AP2 coats  
1004 were monitored by TIRF microscopy. Synthetic clathrin/AP2 coated vesicles (shown in the figure) and  
1005 clathrin/AP2 coats were captured with a biotinylated monoclonal antibody specific for clathrin light  
1006 chain on the surface of a PLL-PEG-Biotin-Streptavidin modified glass coverslip in a microfluidic chip.

1007 (b) Representative transmission electron microscopy images of negatively stained clathrin/AP2 coats  
1008 (CC) (left), synthetic clathrin/AP2 coated vesicles (sCCV) (middle) or liposomes (right). Scale bar, 50  
1009 nm.

1010 (c) Representative TIRF image before initiation of the single-object uncoating assay. The snapshot  
1011 combines images acquired in three different fluorescence channels (red and blue channels shifted  
1012 right by 5 pixels) used to monitor the signal from coats and synthetic coated vesicles tagged with  
1013 clathrin LCa-AF488 (green) and synthetic coated vesicles containing PtdIns(3)P- or PtdIns(4)P and  
1014 Dil (red) or DiD (blue), respectively. Scale bar, 5  $\mu$ m.

1015 (d) Representative uncoating profiles from single synthetic clathrin/AP2 coated vesicles. The plots  
1016 show fluorescence intensity traces of the clathrin signal imaged at 1 s intervals starting 10 s prior to  
1017 arrival of the uncoating mix (dashed vertical line at 0 s). The abrupt loss of signal in the green trace  
1018 represents early release of the synthetic coated vesicle from the antibody on the glass surface. The  
1019 enlarged boxed region (right corner) illustrates with a red arrow the onset of the uncoating reaction of  
1020 the purple trace; the time it took to reach this point is the defined as the uncoating dwell time.

1021 (e) Cumulative distributions of uncoating dwell times of clathrin/AP2 and synthetic clathrin/AP2 coated  
1022 vesicles containing PtdIns(4,5)P<sub>2</sub> with either PtdIns(3)P or PtdIns(4)P obtained upon incubation with  
1023  $\Delta$ PTEN-Aux1, full length Aux1, or full length GAK (P: PTEN-like domain; CB: clathrin-binding domain;  
1024 J: J domain; K: kinase domain). The uncoating dwell times corresponding to 50% of the distributions  
1025 are indicated (dashed lines) are from 3-10 independent experiments.

1026

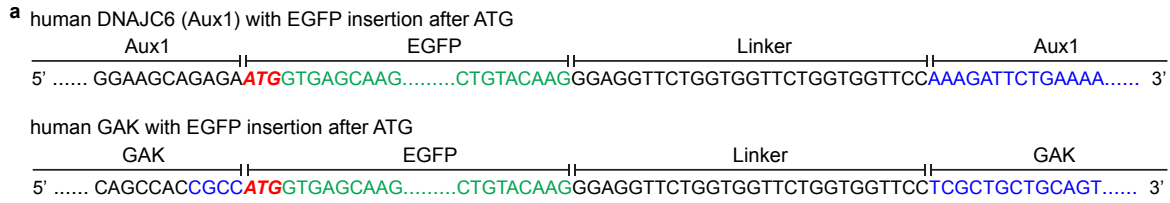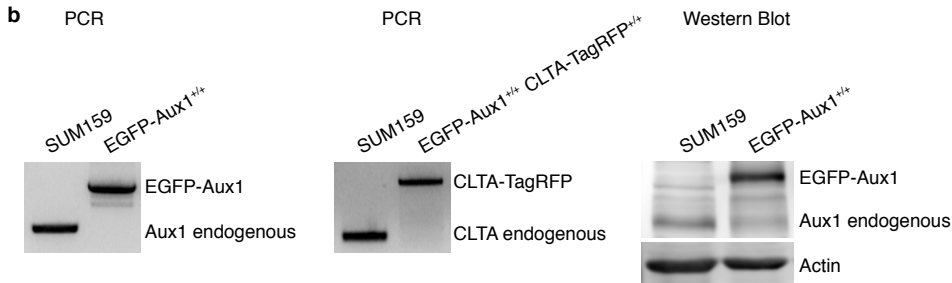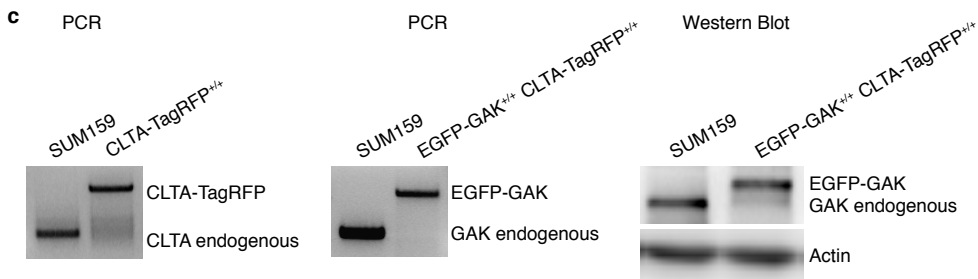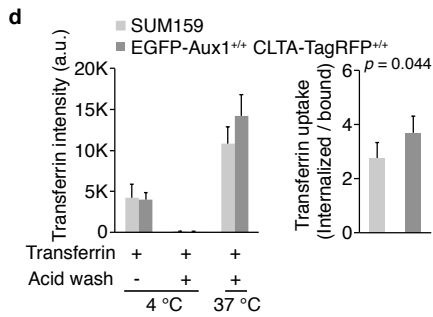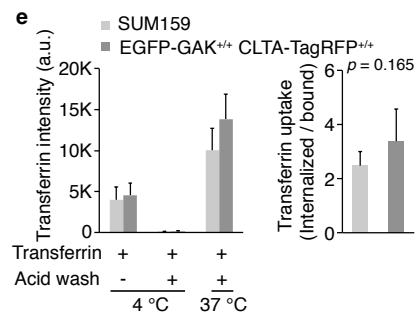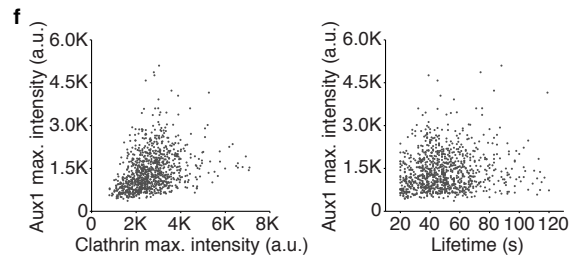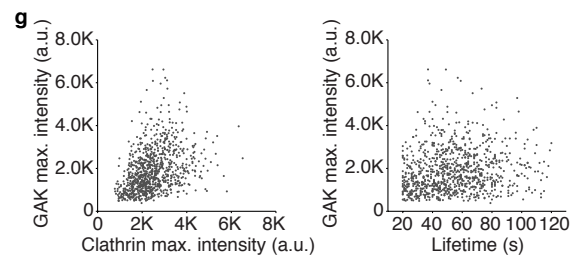

1028 **Supplementary Figure1. Gene-editing of SUM159 cells to express CLTA-TagRFP and EGFP-**  
1029 **Aux1 or CLTA-TagRFP and EGFP-GAK.**

1030 (a) CRISPR/Cas9 gene-editing strategy used to incorporate EGFP at the N-terminus of Aux1 or GAK.  
1031 The resulting DNA sequences including the short linker between the C-terminus of EGFP and N-  
1032 terminus of Aux1 or GAK are shown.

1033 (b) Genomic PCR analysis showing biallelic integration first of EGFP into the *DNAJC6* (Aux1)  
1034 genomic locus to generate the clonal gene-edited cell line EGFP-Aux1<sup>+/+</sup> (left panel) and then of  
1035 TagRFP into the *CLTA* genomic locus of the same cells to generate the clonal double gene-edited cell  
1036 line EGFP-Aux1<sup>+/+</sup> CTLA-TagRFP<sup>+/+</sup> (center panel). Right panel shows western-blot analysis of cell  
1037 lysates from the EGFP-Aux1<sup>+/+</sup> cells probed with antibodies for Aux1/GAK and actin. Although the  
1038 genomic PCR shows biallelic integration of EGFP sequence into the Aux1 genomic locus, the western  
1039 blot indicates expression of a small amount (~15%) of untagged Aux1. The expression of EGFP-Aux1  
1040 in EGFP-Aux1<sup>+/+</sup> cells was higher than endogenous Aux1 in the parental SUM159 cells; this up-  
1041 regulation of EGFP-Aux1 expression, due either to single-cell cloning selection or to the genome  
1042 editing.

1043 (c) Genomic PCR analysis showing biallelic integration first of TagRFP into the *CLTA* genomic locus  
1044 to generate the clonal gene-edited cell line CLTA-TagRFP<sup>+/+</sup> (left panel) and then of EGFP into the  
1045 *GAK* genomic locus of the same cells to generate the clonal double gene-edited cell line EGFP-  
1046 GAK<sup>+/+</sup> and CTLA-TagRFP<sup>+/+</sup> (center panel). Right panel shows western-blot analysis of cell lysates  
1047 from the EGFP-GAK<sup>+/+</sup> and CTLA-TagRFP<sup>+/+</sup> cells probed with antibodies for GAK and actin.

1048 (d) Effect of expression of EGFP-Aux1 and CTLA-TagRFP on receptor-mediated uptake of transferrin.  
1049 The histogram shows similar amounts of internalized Alexa Fluor 647-conjugated transferrin in  
1050 parental and gene-edited EGFP-Aux1<sup>+/+</sup> and CTLA-TagRFP<sup>+/+</sup> cells probed by flow cytometry (n = 5  
1051 experiments, mean ± S.D., P value by two-tailed *t*-test).

1052 (e) Effect of expression of EGFP-GAK and CTLA-TagRFP on receptor-mediated uptake of transferrin  
1053 (n = 5 experiments, mean ± S.D., P value by two-tailed *t*-test).

1054 (f) Scatter plots comparing maximum fluorescence intensities of EGFP-Aux1 and CLTA-TagRFP with  
1055 each other (left panel; Pearson correlation coefficient  $r = 0.331$ ) and maximum fluorescence intensity  
1056 of EGFP-Aux1 with the lifetime of the endocytic coated structure in which it was found (right panel;  
1057 Pearson correlation coefficient  $r = 0.115$ ), from 938 traces in 8 cells. Data from bottom surfaces of  
1058 double gene-edited EGFP-Aux1<sup>+/+</sup> and CLTA-TagRFP<sup>+/+</sup> cells imaged at 1 s intervals for 300 s by  
1059 TIRF microscopy.

1060 (g) Scatter plots comparing maximum fluorescence intensities of EGFP-GAK and CLTA-TagRFP with  
1061 each other (left panel; Pearson correlation coefficient  $r = 0.373$ ) and maximum fluorescence intensity  
1062 of EGFP-GAK with the lifetime of the endocytic coated structure in which it was found (right panel;  
1063 Pearson correlation coefficient  $r = 0.153$ ), from 900 traces in 8 cells. Data from bottom surfaces of

1064 double gene-edited EGFP-GAK<sup>+/+</sup> and CLTA-TagRFP<sup>+/+</sup> cells imaged at 1 s intervals for 300 s by  
1065 TIRF microscopy.  
1066



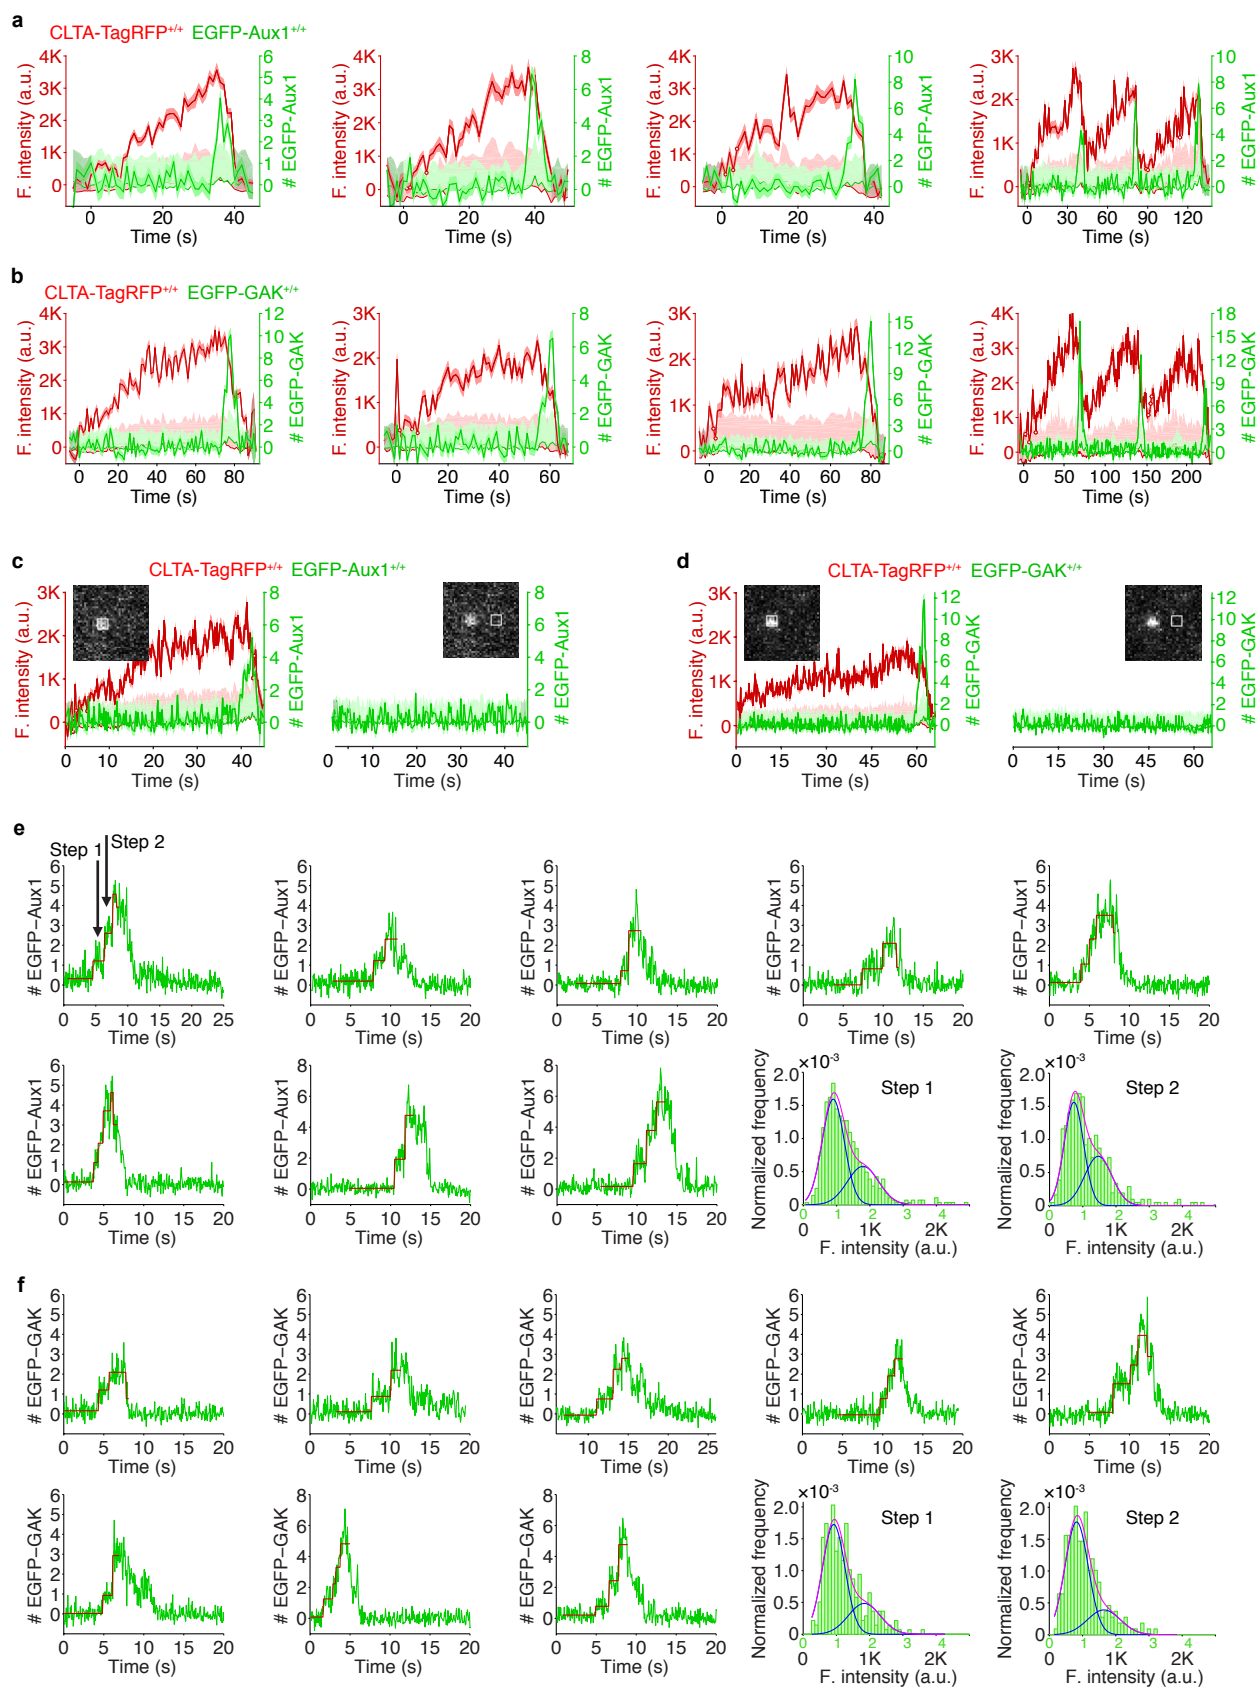

1068 **Supplementary Figure 2. Recruitment of Aux1 and GAK to clathrin-coated vesicles in genome-**  
1069 **edited cells.**

1070 (a) Representative plots of single endocytic events (first 3 panels) and hotspots (last panel) showing  
1071 fluorescence intensity traces for CLTA-TagRFP and EGFP-Aux1 (arbitrary units for CLTA; number of  
1072 molecules for Aux1) imaged at 1 s intervals by TIRF microscopy.

1073 (b) Representative plots of single endocytic events (first 3 panels) and hotspots (last panel) showing  
1074 fluorescence intensity traces for CLTA-TagRFP and EGFP-GAK imaged at 1 s intervals by TIRF  
1075 microscopy.

1076 (c) EGFP-Aux1 recruitment was not detected while coated pits were assembling. Representative plots  
1077 of a single endocytic event showing fluorescence intensity traces for CLTA-TagRFP and EGFP-Aux1  
1078 (left panel) imaged at 250 ms intervals by TIRF microscopy. The EGFP-Aux1 signal was detected and  
1079 measured as indicated in the insert image. Right panel shows the fluorescence intensity fluctuations  
1080 of the EGFP channel measured from the boxed area 12 pixels away from the detected EGFP-Aux1  
1081 burst signal.

1082 (d) EGFP-GAK recruitment was not detected while coated pits were assembling.

1083 (e) Stepwise recruitment of Aux1 to coated vesicles. Representative plots of EGFP-Aux1 burst-like  
1084 recruitment (shown as number of molecules for Aux1) imaged at 62.5 ms intervals with TIRF  
1085 microscopy; fit (red) obtained by applying a step-fitting function to estimate the average recruited  
1086 molecules during the initiation phase of Aux1 burst-like recruitment. The last two panels show the  
1087 histogram distributions (with Gaussian fitting) of EGFP-Aux1 molecules during the first step and  
1088 second step of its recruitment.

1089 (f) Stepwise recruitment of GAK to coated vesicles.

1090

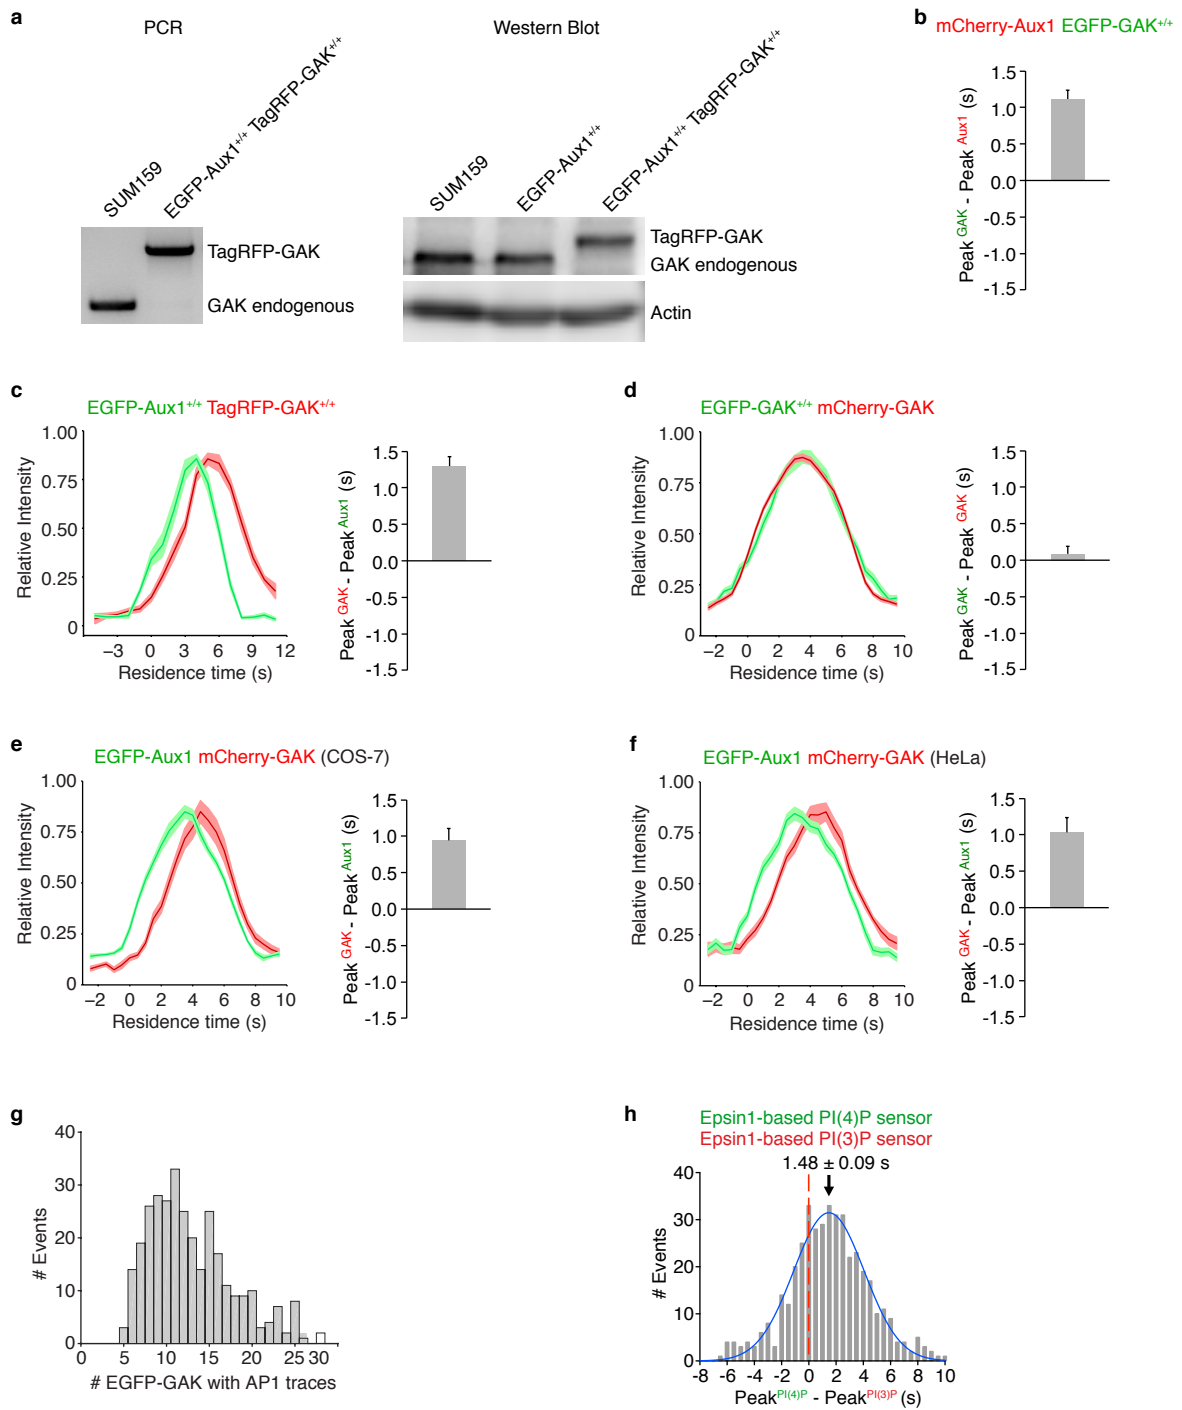

1092 **Supplementary Figure 3. Sequential bursts of Aux1 and GAK during uncoating of clathrin-**  
1093 **coated vesicles at the plasma membrane and recruitment of GAK to the intracellular clathrin-**  
1094 **containing carriers.**

1095 (a) The TagRFP sequence was inserted into the *GAK* genomic locus of the EGFP-Aux1<sup>+/+</sup> cells to  
1096 generate the double gene-edited cells EGFP-Aux1<sup>+/+</sup> and TagRFP-GAK<sup>+/+</sup>, as confirmed by genomic  
1097 PCR analysis (left panel) and western blot analysis probed with antibodies for GAK and actin (right  
1098 panel).

1099 (b) Gene-edited EGFP-GAK<sup>+/+</sup> cells transiently expressing mCherry-Aux1 were imaged at 0.5 s  
1100 intervals for 60 s by TIRF microscopy. The average time interval between the peaks of intensity for  
1101 EGFP-GAK and mCherry-Aux1 is shown (mean ± S.D., n = 8 cells).

1102 (c) Bottom surfaces of EGFP-Aux1<sup>+/+</sup> and TagRFP-GAK<sup>+/+</sup> cells were imaged at 1 s intervals for 120 s  
1103 by TIRF microscopy. The left panel shows the averaged fluorescence intensity traces (mean ± S.E.)  
1104 of both EGFP-Aux1 (green) and TagRFP-GAK (red) for the EGFP-Aux1 3–12 s cohort (1560 traces  
1105 from 12 cells). The right panel shows the average time interval between the peaks of intensity for  
1106 EGFP-Aux1 and TagRFP-GAK (mean ± S.D, n = 6 cells).

1107 (d) Gene-edited EGFP-GAK<sup>+/+</sup> cells transiently expressing mCherry-GAK were imaged at 0.5 s  
1108 intervals for 60 s by TIRF microscopy. The left panel shows the averaged fluorescence intensity  
1109 traces (mean ± S.E.) of EGFP-GAK (green) and mCherry-GAK (red) from the EGFP-GAK 3–12 s  
1110 cohort (2306 traces from 15 cells). The right panel shows the average interval between the peak  
1111 intensities of EGFP-GAK and mCherry-GAK (mean ± S.D., n = 15 cells).

1112 (e) COS-7 cells transiently expressing EGFP-Aux1 and mCherry-GAK were imaged at 0.5 s intervals  
1113 for 60 s by TIRF microscopy. The left panel shows the averaged fluorescence intensity traces (mean  
1114 ± S.E.) of EGFP-Aux1 (green) and mCherry-GAK (red) from the EGFP-Aux1 3–12 s cohort (656  
1115 traces from 9 cells). The right panel shows the average interval between the peak intensities of  
1116 EGFP-Aux1 and mCherry-GAK (mean ± S.D., n = 9 cells).

1117 (f) HeLa cells transiently expressing EGFP-Aux1 and mCherry-GAK were imaged at 0.5 s intervals for  
1118 60 s by TIRF microscopy. The left panel shows the averaged fluorescence intensity traces (mean ±  
1119 S.E.) of EGFP-Aux1 (green) and mCherry-GAK (red) from the EGFP-Aux1 3–12 s cohort (595 traces  
1120 from 11 cells). The right panel shows the average interval between the peak intensities of EGFP-Aux1  
1121 and mCherry-GAK (mean ± S.D., n = 11 cells).

1122 (g) Gene-edited EGFP-GAK<sup>+/+</sup> cells stably expressing AP1-TagRFP were imaged in 3D by lattice  
1123 light-sheet microscopy. Distribution of the maximum number of EGFP-GAK molecules recruited to  
1124 individual AP1-coated carriers (325 traces from 11 cells).

1125 (h) Bottom surfaces of cells transiently expressing Epsin1-based PtdIns(4)P sensor EGFP-  
1126 P4M(DrrA)-Div2(508-736)-Epsin1(255-501) and PtdIns(3)P sensor mCherry-2xFYVE(Hrs)-Div2(508-  
1127 736)-Epsin1(255-501) imaged by TIRF microscopy every 0.5 s for 100 s. Distribution (fit with a single

1128 Gaussian) for the interval between the peaks within single events showing that the Epsin1-based  
1129 PtdIns(3)P sensor precedes the PtdIns(4)P sensor by  $1.48 \pm 0.09$  s (mean  $\pm$  S.E., 436 traces from 23  
1130 cells).  
1131

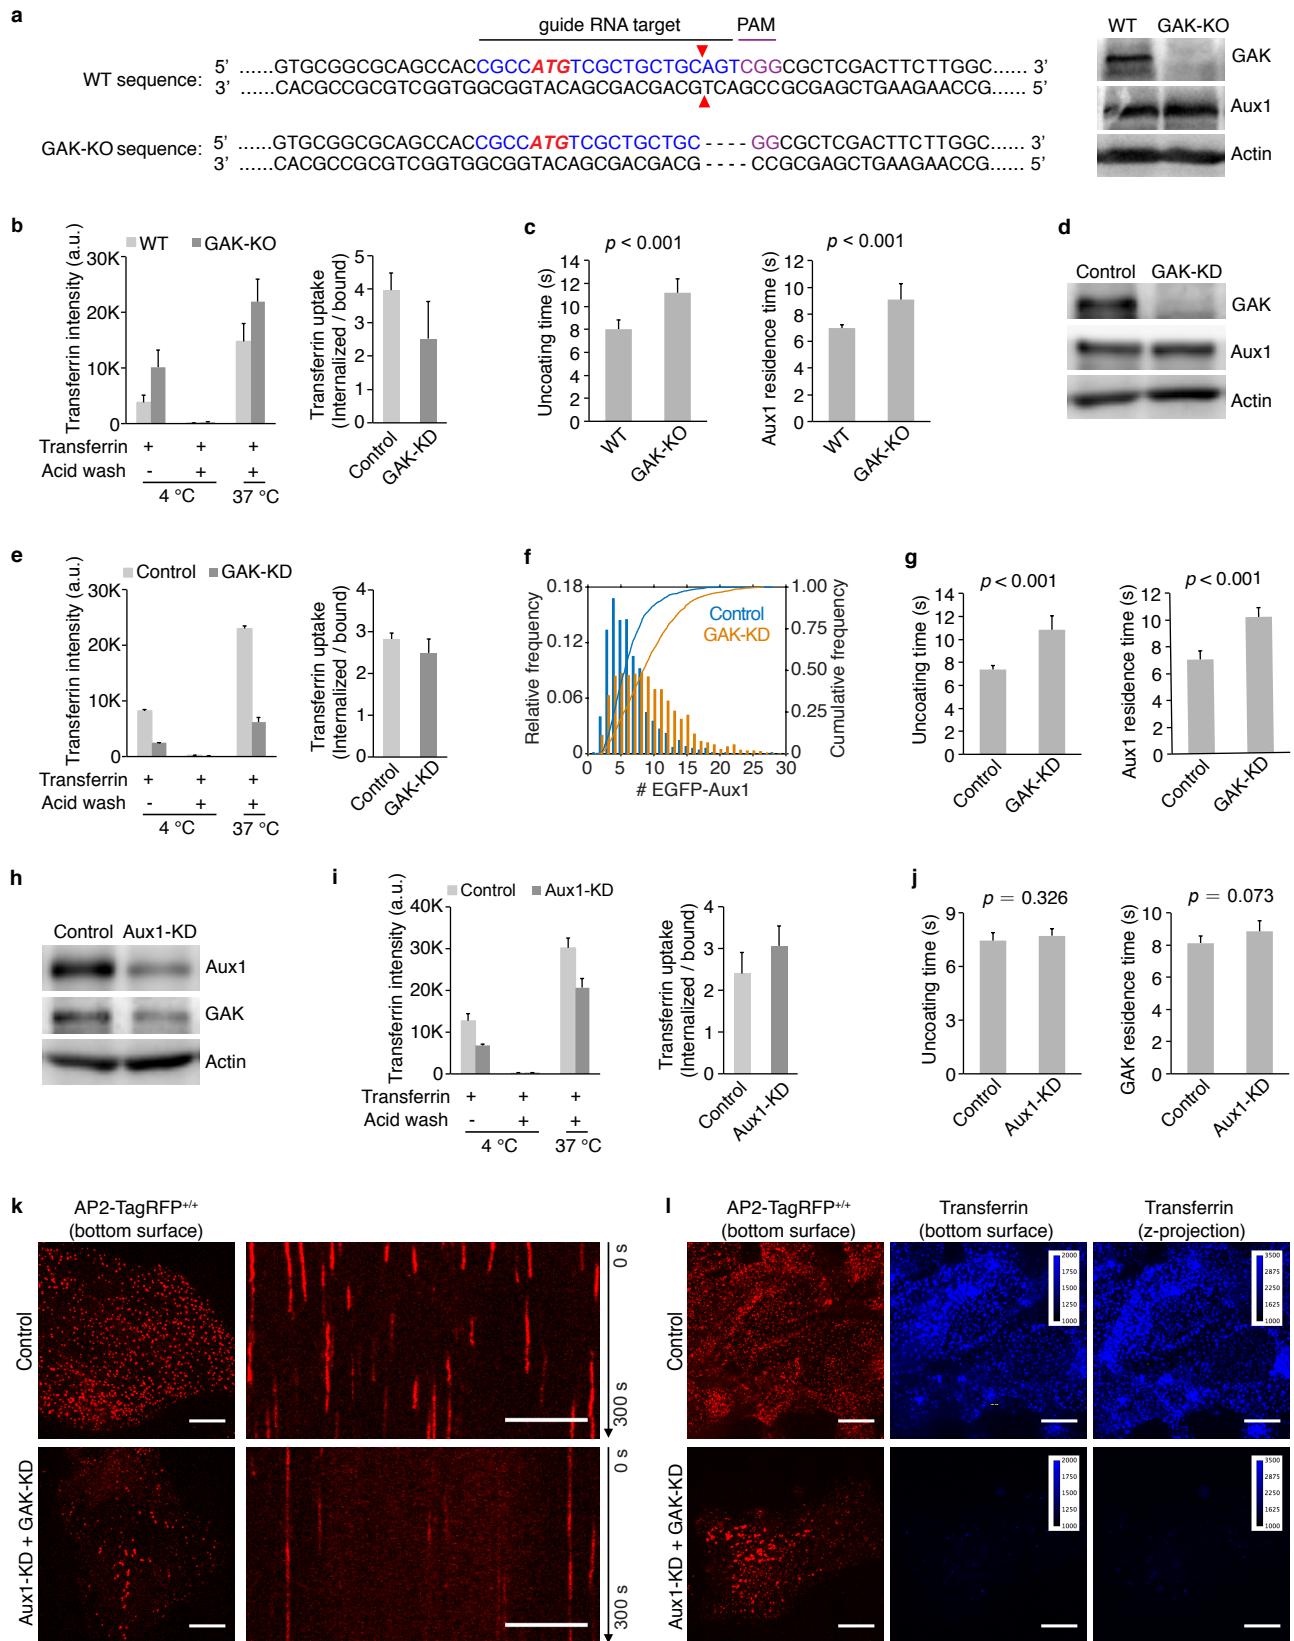

1133 **Supplementary Figure 4. Effects on clathrin-mediated endocytosis of knockout or knockdown**  
1134 **of GAK and knockdown of Aux1.**

1135 (a) CRISPR/Cas9 gene-editing strategy used to knock out GAK in cells gene-edited for EGFP-Aux1<sup>+/+</sup>  
1136 and CTLA-TagRFP<sup>+/+</sup>. The double strand break (red triangles) induced by Cas9 resulted in elimination  
1137 of four nucleotides (dotted lines). Loss of GAK expression was confirmed by western blot with  
1138 antibodies against GAK, Aux1/GAK and actin (right panel).

1139 (b) Effect of GAK knockout on receptor-mediated uptake of transferrin (n = 3 experiments, mean ±  
1140 S.D.).

1141 (c) Uncoating time and Aux1 residence time, in cells lacking GAK. Data from bottom surfaces of  
1142 double gene-edited EGFP-Aux1<sup>+/+</sup> and CLTA-TagRFP<sup>+/+</sup> cells with GAK (n= 5 cells) or lacking GAK by  
1143 knockout (n = 7 cells) imaged at 1 s intervals for 200 s by TIRF microscopy (mean ± S.D., P values by  
1144 two-tailed *t*-test).

1145 (d) Western blot analysis of EGFP-Aux1<sup>+/+</sup> and CLTA-TagRFP<sup>+/+</sup> cells treated with lentivirus containing  
1146 control shRNA (Control) or shRNA specific for GAK (GAK-KD), showing specific reduction of GAK  
1147 expression 5 days after transduction.

1148 (e) Effect of GAK knockdown on receptor-mediated uptake of transferrin (n = 2 experiments, mean ±  
1149 S.D.). See legend for panel (b).

1150 (f) Influence of GAK depletion on Aux1 recruitment. Data from bottom surfaces of double gene-edited  
1151 EGFP-Aux1<sup>+/+</sup> and CLTA-TagRFP<sup>+/+</sup> cells with GAK (1058 traces, 8 cells) or depleted of GAK by  
1152 knockdown (1380 traces, 9 cells) imaged at 1 s intervals for 200 s by TIRF microscopy. The number  
1153 of recruited EGFP-Aux1 molecules is significantly increased (Cohen's *d* = 0.68).

1154 (g) Influence of GAK depletion on uncoating time (left) and Aux1 residence time (right). Data from  
1155 bottom surfaces of double gene-edited EGFP-Aux1<sup>+/+</sup> and CLTA-TagRFP<sup>+/+</sup> cells with GAK (n = 5  
1156 cells) or depleted of GAK by knockdown (n = 5 cells) imaged at 1 s intervals for 200 s by TIRF  
1157 microscopy (mean ± S.D., P values by two-tailed *t*-test).

1158 (h) Western blot analysis of parental SUM159 cells incubated with lentivirus containing control shRNA  
1159 or shRNA specific for Aux1 (Aux1-KD) showing specific reduction of Aux1 expression 5 days after  
1160 transduction.

1161 (i) Effect of Aux1 knockdown in gene-edited EGFP-GAK<sup>+/+</sup> and CTLA-TagRFP<sup>+/+</sup> cells on receptor-  
1162 mediated uptake of transferrin (n = 2 experiments, mean ± S.D.).

1163 (j) Influence of Aux1 depletion on uncoating time (left) and GAK residence time (right). Data from  
1164 bottom surfaces of double gene-edited EGFP-GAK<sup>+/+</sup> and CLTA-TagRFP<sup>+/+</sup> cells with Aux1 (n = 5  
1165 cells) or depleted of Aux1 by knockdown (n = 5 cells) imaged at 1 s intervals for 200 s by TIRF  
1166 microscopy (mean ± S.D., P values by two-tailed *t*-test).

1167 (k) Bottom surfaces of AP2-TagRFP<sup>+/+</sup> cells treated with lentivirus containing control shRNA or a  
1168 mixture of shRNA targeting Aux1 and GAK (Aux1-KD + GAK-KD) imaged at 2 s intervals for 300 s by

1169 spinning-disk confocal microscopy. The representative images are from a single time point; the  
1170 corresponding kymograph shows the entire time series. Scale bars, 10  $\mu\text{m}$ .

1171 (I) AP2-TagRFP<sup>+/+</sup> cells with or without double Aux1+GAK knockdown incubated with 10  $\mu\text{g/ml}$  Alexa  
1172 Fluor 647-conjugated transferrin for 10 min at 37°C and then imaged in 3D using spinning-disk  
1173 confocal microscopy (30 imaging planes spaced 0.35  $\mu\text{m}$ ). Images from the bottom surface of control  
1174 cells show diffraction-limited AP2-TagRFP spots associated with endocytic coated pits and coated  
1175 vesicles; in cells depleted of Aux1 and GAK, the punctate distribution is replaced by characteristic  
1176 larger patches. The images also show the extent of surface binding (bottom surface) and  
1177 internalization (maximum z-projection of the 30 stacks) of transferrin in the control cells and its  
1178 absence in the cells impaired in endocytosis due to the Aux1 and GAK depletion. Scale bars, 10  $\mu\text{m}$ .  
1179





1181 **Supplementary Figure 5. Roles of the PTEN-like domain and clathrin-binding domain of**  
1182 **auxilins in the endocytic and secretory pathways.**

1183 (a) AP2-TagRFP<sup>+/+</sup> cells with or without GAK (AP2-TagRFP GAK-KO) treated with control siRNA or  
1184 siRNA targeting Aux1 for 3 days (2 sequential transfections), then subjected to transient expression of  
1185 the indicated EGFP-tagged constructs for additional 1 days followed by measurements of Alexa Fluor  
1186 647-conjugated transferrin uptake by flow cytometry. The plots (left panels) and equivalent histograms  
1187 (right panels) show comparisons of the internalized transferrin (37°C with acid wash) in the absence  
1188 or presence of low and high levels of ectopic expression of the indicated constructs.

1189 (b) The GAK-KO AP2-TagRFP<sup>+/+</sup> cells were treated with siRNA targeting endogenous Aux1 and then  
1190 transfected for transient expression of EGFP-tagged full length Aux1 (left panel) or Aux1 lacking the  
1191 PTEN-like domain (right panel). The cells were imaged at 1 s intervals for 300 s by TIRF microscopy.  
1192 The averaged fluorescence intensity traces (mean ± S.E.) for AP2-TagRFP (red) and EGFP-tagged  
1193 constructs (green) were identified in 9 and 7 cells, respectively, and then grouped in cohorts  
1194 according to lifetimes. The numbers of analyzed traces are shown above each cohort.

1195 (c) The GAK-KO AP2-TagRFP<sup>+/+</sup> cells were treated with siRNA targeting endogenous Aux1 and then  
1196 transfected for transient expression of EGFP-tagged constructs as indicated. The cells with EGFP  
1197 expression at a similar level as the endogenous auxilins were imaged at 1 s intervals for 300 s by  
1198 TIRF microscopy. Distribution of the maximum number of EGFP-tagged molecules recruited during  
1199 the uncoating burst (From the left to the right panel: 363 traces from 5 cells, 348 traces from 6 cells,  
1200 587 traces from 5 cells, 221 traces from 5 cells, respectively).

1201 (d) Genomic PCR analysis showing biallelic integration of TagRFP into the *AP1S1* genomic locus to  
1202 generate the clonal gene-edited cell line AP1-TagRFP<sup>+/+</sup>.

1203 (e) AP1-TagRFP<sup>+/+</sup> cells treated with lentivirus containing control shRNA or shRNA targeting GAK for  
1204 4 days, then subjected to transient expression of the indicated EGFP-tagged constructs for additional  
1205 1 day, and volumetrically imaged by spinning-disk confocal microscopy (34 sequential optical sections  
1206 spaced 0.3 μm). Maximum intensity z projections acquired using the same acquisition parameters as  
1207 with gene-edited EGFP-GAK<sup>+/+</sup> cells, making it possible to identify cells ectopically expressing at the  
1208 same level as endogenous GAK. Scale bars, 10 μm.

1209

**a**

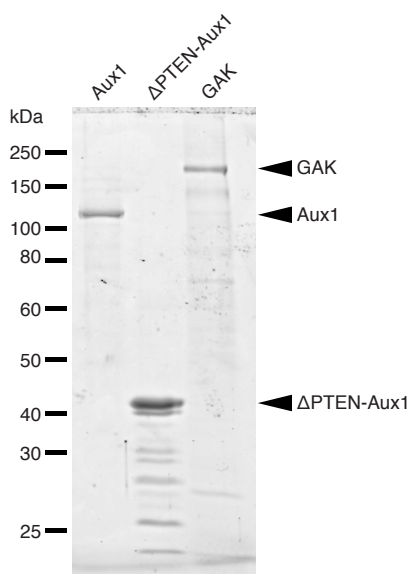

**b**

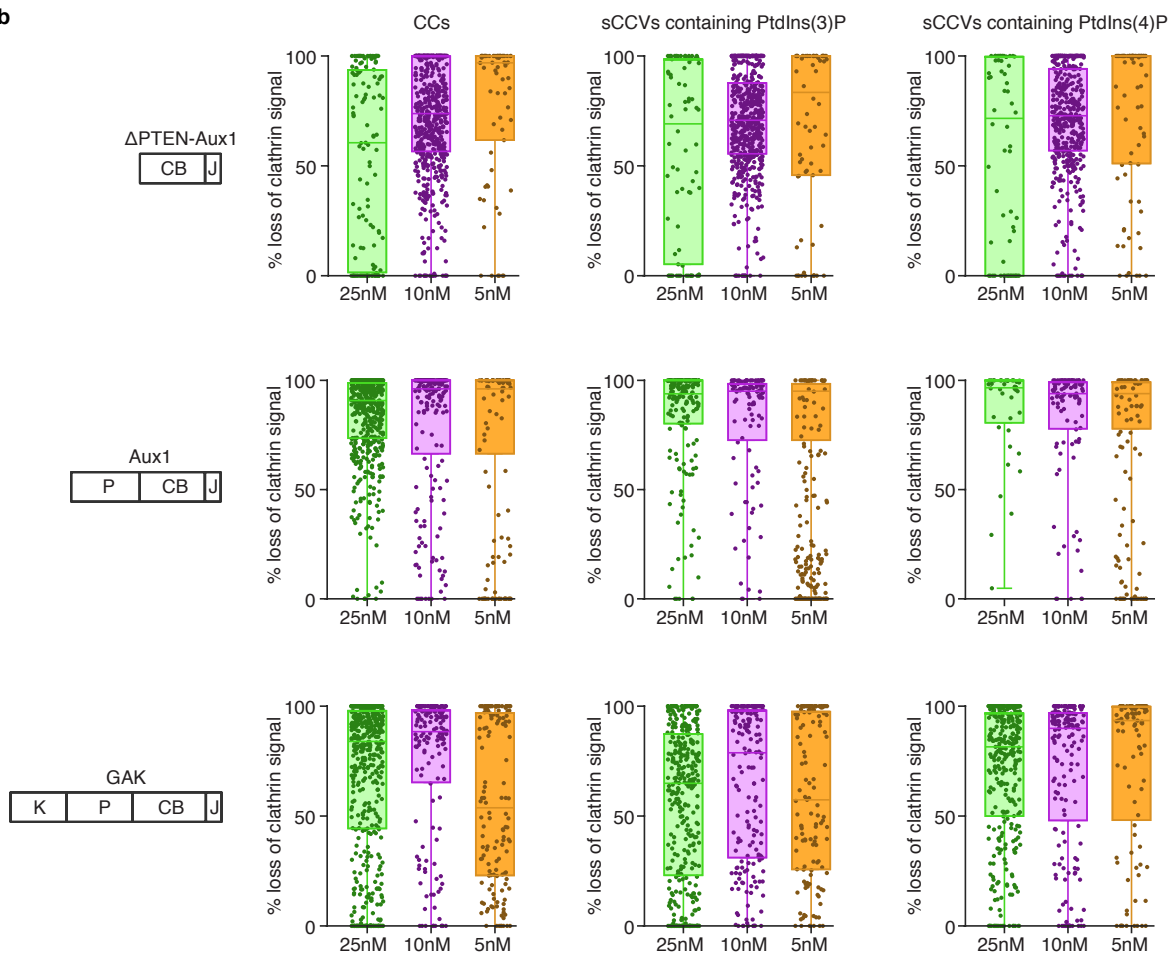

Supplementary Figure 6

1211 **Supplementary Figure 6. *In vitro* disassembly of clathrin/AP2 coats and synthetic clathrin/AP2**  
1212 **coated vesicles containing PtdIns(3)P or PtdIns(4)P.**

1213 (a) SDS-PAGE (and Coomassie Blue staining) of the recombinant full length Aux1,  $\Delta$ PTEN-Aux1 and  
1214 full length GAK. Molecular weight markers are shown. For GAK and  $\Delta$ PTEN-Aux1, impurities (of high  
1215 electrophoretic mobility relative to the target species) reduced the full-length target protein proportion  
1216 to 60% and 50%, respectively (estimated by band densitometry).

1217 (b) Single-object uncoating efficiency determined from the loss of the clathrin LCa-Alexa Fluor 488  
1218 fluorescence signal as a function of  $\Delta$ PTEN-Aux1, full length Aux1 or full length GAK concentration (5-  
1219 25 nM range) added together with 1  $\mu$ M Hsc70 and 5 mM ATP. Each sample included a mixture of  
1220 clathrin/AP2 coats (CC) together with synthetic clathrin/AP2 coated vesicles containing PtdIns(4,5)P<sub>2</sub>  
1221 together with either PtdIns(3)P or PtdIns(4)P (distinguished by labeling with DiI or DiD lipid dyes).  
1222 Data was acquired at 1 s intervals for 150 s using 3-color TIRF microscopy; each dot in the box plots  
1223 represents the final uncoating efficiency for a single object. Box plots include the median and data are  
1224 from three independent experiments.

1225

1226

1227

1228 **Supplementary Video Legends**

1229

1230 **Supplementary Video 1. Dynamics of EGFP-Aux1 recruitment to clathrin-coated vesicles.**

1231 Bottom surface of a SUM159 cell gene-edited for EGFP-Aux1<sup>+/+</sup> and CLTA-TagRFP<sup>+/+</sup> was imaged by  
1232 TIRF microscopy every 1 s for 200 s. To facilitate visualization, the EGFP channel was shifted  
1233 laterally by 5 pixels in the right panel.

1234

1235 **Supplementary Video 2. Dynamics of EGFP-GAK recruitment to clathrin-coated vesicles.**

1236 Bottom surface of a SUM159 cell gene-edited for EGFP-GAK<sup>+/+</sup> and CLTA-TagRFP<sup>+/+</sup> was imaged by  
1237 TIRF microscopy every 1 s for 200 s. To facilitate visualization, the EGFP channel was shifted  
1238 laterally by 5 pixels in the right panel.

1239

1240 **Supplementary Video 3. Sequential recruitment of EGFP-Aux1 and TagRFP-GAK to clathrin-**  
1241 **coated vesicles.**

1242 Bottom surface of a SUM159 cell gene-edited for EGFP-Aux1<sup>+/+</sup> and TagRFP-GAK<sup>+/+</sup> was imaged by  
1243 TIRF microscopy every 1 s for 120 s. To facilitate visualization, the TagRFP channel was shifted  
1244 laterally by 5 pixels in the right panel.

1245

1246 **Supplementary Video 4. Single-object *in vitro* disassembly of clathrin/AP2 coats and synthetic**  
1247 **clathrin/AP2 coated vesicles.** The still image imaged with TIRF at the beginning of the time series

1248 corresponds to clathrin/AP2 coats and synthetic clathrin/AP2 coated vesicles containing PtdIns(4,5)P<sub>2</sub>  
1249 together with either PtdIns(3)P or PtdIns(4)P distinguished by labeling with Dil (red) or DiD (blue) lipid  
1250 dyes. Prior to the time series, the channels corresponding to clathrin LCa-Alexa Fluor 488 (green)  
1251 were shifted 5 pixels with respect to the lipids. The time series follows the uncoating reaction and  
1252 corresponds to the clathrin fluorescence signal as a function of 25 nM ΔPTEN-Aux1 added together  
1253 with 1 μM Hsc70 and 5 mM ATP. Data was acquired at 1 s intervals for 150 s using 3-color TIRF  
1254 microscopy.

1255
